# Supplementary material for: Impacts of β-diketonate terminal ligands on slow magnetic relaxation and luminescence thermometry in dinuclear DyIII single-molecule magnets
Source: Royal Society of Chemistry journal article supplement (doi:10.1039/d4dt02200a), 2025-01-01
Supplement: d4dt02200a1.pdf [file d4dt02200a1.pdf]

## Supplementary information

### Impacts of $\beta$ -Diketonate Terminal Ligands on Slow Magnetic Relaxation and Luminescence Thermometry in Dinuclear Dy<sup>III</sup> Single-Molecule Magnets

Airton Germano Bispo-Jr,<sup>a,b</sup> Diogo Alves Gállico,<sup>a</sup> Jeffrey S. Ovens,<sup>a</sup> Fernando Aparecido Sigoli,<sup>\*b</sup> Muralee Murugesu<sup>\*a</sup>

#### Contents

|                                                        |    |
|--------------------------------------------------------|----|
| Supplementary note S1 - Experimental procedure .....   | 2  |
| Supplementary note S2 - Crystallographic data .....    | 6  |
| Supplementary note S3 – Steady state luminescence..... | 12 |
| Supplementary note S4 – Additional magnetic data ..... | 16 |
| Supplementary note S5 – Luminescence thermometry ..... | 27 |

### Supplementary note S1 - Experimental procedure

All reagents and solvents were purchased from AmBeed, Strem Chemicals, Oakwood Chemical, and Thermo Fisher Scientific and used without any further purification. The 2,2'-bipyrimidine (bpm) ligand was prepared as described in the literature.<sup>1</sup>

The precursor  $[\text{Dy}(\text{hexd})_3(\text{H}_2\text{O})_2]$  (molecular weight =  $537.92 \text{ g mol}^{-1}$ ) was prepared by reacting  $0.2000 \text{ g}$  ( $1.75 \text{ mmol}$ ) of the Hhexd ligand with  $0.0419 \text{ g}$  ( $1.75 \text{ mmol}$ ) of LiOH in  $10 \text{ mL}$  of water. After that,  $0.2197 \text{ g}$  ( $0.583 \text{ mmol}$ ) of  $\text{DyCl}_3 \cdot 6\text{H}_2\text{O}$  in  $10 \text{ mL}$  of water was added to the deprotonated ligand solution and a white precipitate was observed. After two hours of stirring, the white precipitate was filtered, washed several times with water, and vacuum dried for 24 hours. The precursor  $[\text{Dy}(\text{hpd})_3(\text{H}_2\text{O})_2]$  (molecular weight =  $580.01 \text{ g mol}^{-1}$ ) was prepared following the aforementioned procedure, but using  $0.5000 \text{ g}$  ( $3.90 \text{ mmol}$ ) of the Hhpd ligand,  $0.0934 \text{ g}$  of LiOH ( $3.90 \text{ mmol}$ ), and  $0.4900 \text{ g}$  ( $1.3 \text{ mmol}$ ) of  $\text{DyCl}_3 \cdot 6\text{H}_2\text{O}$ .

For the synthesis of  $[\text{Dy}_2\text{bpm}(\text{hexd})_6]$  (**1**),  $0.2000 \text{ g}$  ( $0.37 \text{ mmol}$ ) of  $[\text{Dy}(\text{hexd})_3(\text{H}_2\text{O})_2]$  was dissolved in  $10 \text{ mL}$  of methanol. After that,  $0.0292 \text{ g}$  ( $0.185 \text{ mmol}$ ) of bpm dissolved in  $10 \text{ mL}$  of MeOH was added to the  $[\text{Dy}(\text{hexd})_3(\text{H}_2\text{O})_2]$ /methanol solution. The final solution was then refluxed for 4 hours. In the sequence, the solution was cooled down to room temperature and left at  $2^\circ\text{C}$  to slowly evaporate. In two days, colorless blocks of single crystals were observed.  $[\text{Dy}_2\text{bpm}(\text{hpd})_6]$  (**2**) was synthesized by applying the aforementioned procedure and using  $0.290 \text{ g}$  ( $0.50 \text{ mmol}$ ) of  $[\text{Dy}(\text{hpd})_3(\text{H}_2\text{O})_2]$  and  $0.0395 \text{ g}$  ( $0.25 \text{ mmol}$ ) of bpm. A scheme representing the synthesis of complexes **1** and **2** is reported in Figure S1.

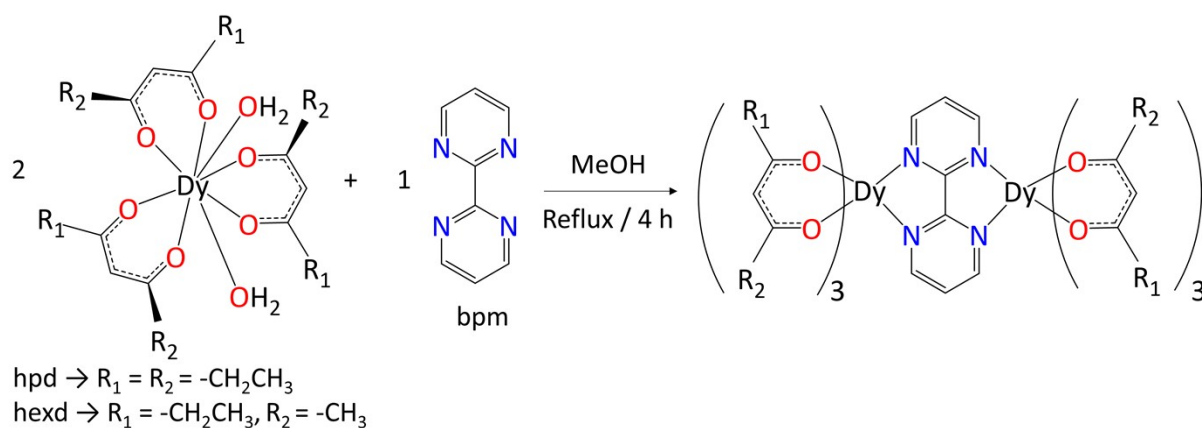

**Figure S1.** Synthesis of complexes **1** and **2**.

$[\text{Dy}_2\text{bpm}(\text{hexd})_6]$  (**1**): synthetic yield (50%, molecular weight =  $1161.96 \text{ g mol}^{-1}$ ,  $0.1075 \text{ g}$ ). FTIR ( $\text{cm}^{-1}$ ), Figure S2: 3078 (w), 2966 (w), 2933 (w), 2866 (w), 1587 (s), 1573 (s), 1564 (s), 1512 (s), 1452 (s), 1414 (s), 1398 (s), 1357 (m), 1324 (m), 1256 (w), 1231 (m), 1218 (m), 1177 (m), 1144 (w), 1108 (w), 1066

(m), 1018 (m), 980 (m), 952 (m), 878 (m), 829 (m), 801 (w), 784 (w), 757 (s), 687 (w), 662 (m). Anal. Calcd (%) for **1** ( $1161.96 \text{ g mol}^{-1}$ ): C, 45.48; H, 5.20; N, 4.84. Found: C, 45.61; H, 4.85; N, 4.87.

$[\text{Dy}_2\text{bpm}(\text{hpd})_6]$  (**2**): synthetic yield (55%, molecular weight =  $1246.11 \text{ g mol}^{-1}$ , 0.1713 g). FTIR ( $\text{cm}^{-1}$ ), Figure S2: 3081 (w), 2969 (w), 2934 (w), 2909 (w), 2873 (w), 1589 (s), 1571 (s), 1566 (s), 1509 (s), 1440 (s), 1422 (s), 1402 (s), 1375 (m), 1366 (m), 1346 (w), 1330 (m), 1304 (m), 1248 (w), 1231 (m), 1216 (m), 1179 (m), 1171 (m), 1105 (w), 1063 (s), 1017 (m), 1003 (m), 980 (m), 950 (m), 878 (m), 852 (m), 833 (m), 808 (w), 784 (w), 757 (s), 687 (w), 662 (m). Anal. Calcd (%) for **2** ( $1246.11 \text{ g mol}^{-1}$ ): C, 48.19; H, 5.82; N, 4.51. Found: C, 48.44; H, 5.47; N, 4.54.

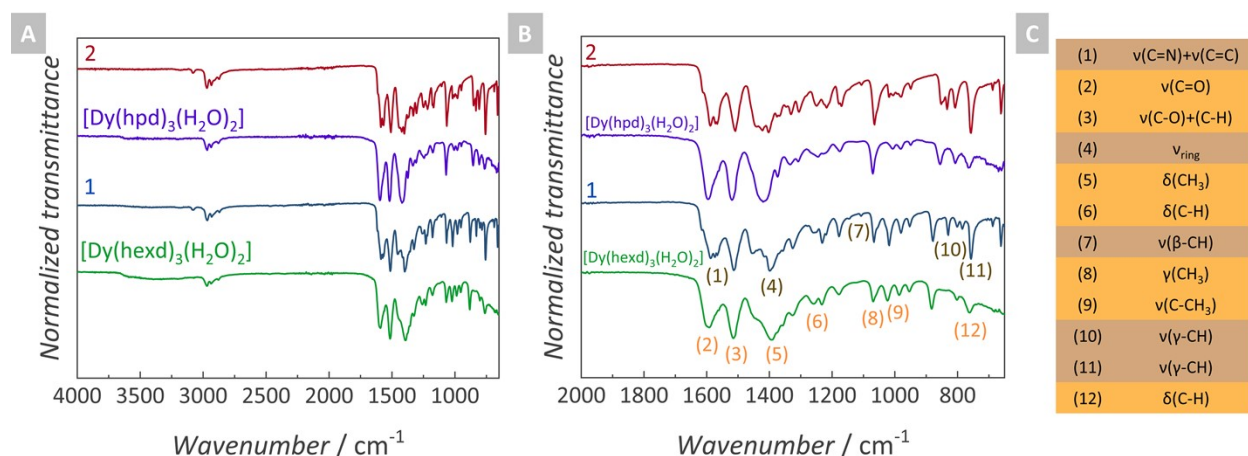

**Figure S2.** (a) FTIR spectra of **1** and **2** compared to the  $[\text{Dy}(\text{hpd})_3(\text{H}_2\text{O})_2]$  and  $[\text{Dy}(\text{hexd})_3(\text{H}_2\text{O})_2]$  precursors. (b) Magnification of the 2000 – 650  $\text{cm}^{-1}$  spectral range. (c) bpm (in brown) and acac<sup>-</sup> (in orange) vibrational mode assignments.

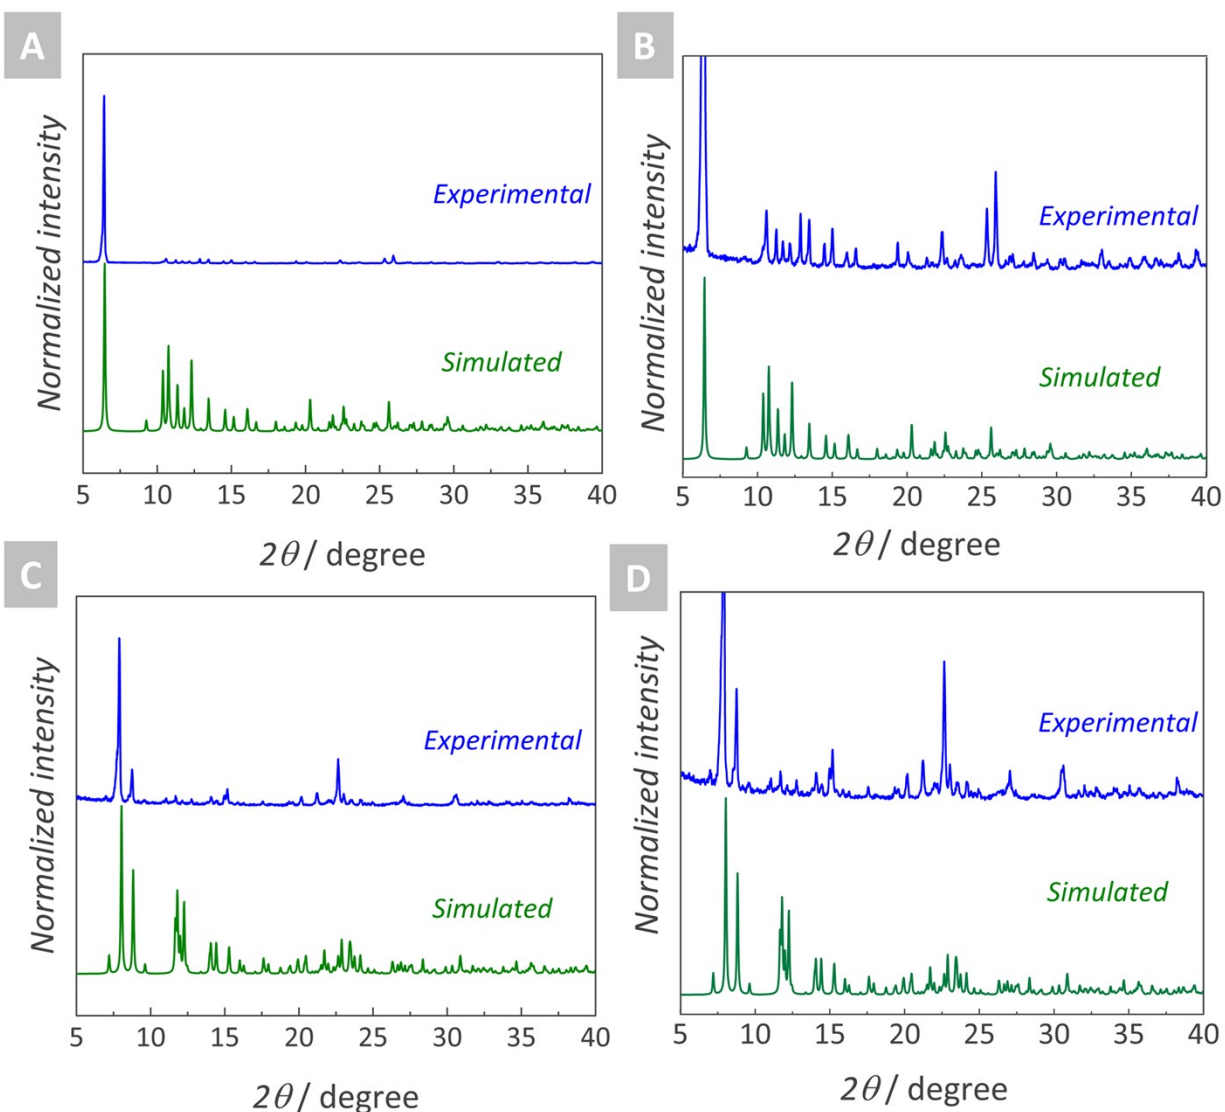

**Figure S3.** Powder XRD of crashed crystals of (a) **1** and (c) **2** compared to the simulated pattern determined from the SC-XRD. Magnification of the PXRD of (b) **1** and (d) **2**.

### Characterization apparatus

**Single-crystal X-ray diffraction (SC-XRD):** SC-XRD were collected from single crystals of **1** and **2** mounted on MiTeGen MicroMounts using Parabar 10312 oil. Data were collected using Bruker AXS APEX II KAPPA or SMART single crystal diffractometers equipped with sealed tube Mo K $\alpha$  sources ( $\lambda = 0.71073$  Å), graphite monochromators, and APEX II CCD detectors. Raw data collection and processing were performed with the APEX II software package from Bruker.<sup>[2]</sup> Initial unit cell parameters were determined using 36 data frames from selected  $\omega$  scans. Semi-empirical absorption corrections based on equivalent reflections were applied.<sup>[3]</sup> Systematic absences in the diffraction dataset and unit cell parameters were

consistent with the assigned space group. The initial structural solutions were determined using ShelXT direct methods,<sup>[4]</sup> and refined with full-matrix least-squares procedures based on F2 using ShelXL and ShelXle.<sup>[5]</sup> Hydrogen atoms were placed geometrically and refined using a riding model.

**Powder X-ray diffraction (PXRD).** PXRD pattern was obtained in a Rigaku Ultima IV diffractometer using Cu K $\alpha$  filtered radiation ( $\lambda = 1.5401 \text{ \AA}$ ) and one diffracted beam monochromator, at 298 K.

**Fourier-transform infrared (FTIR).** FTIR spectra were recorded in a Thermo Nicolet 6700 FTIR spectrometer using the attenuated total reflection mode and a transmission window from 4000 to 525 cm<sup>-1</sup>.

**Elemental analysis.** C, H, N, elementary analysis was measured in a model varioELcube manufactured by Elementar, Germany.

**Photoluminescence.** All the photoluminescence data were obtained for the crashed crystals using a Quanta Master 8075-21 Spectrofluorometer (Horiba) and a red-extended detector (Hamamatsu R13456 red extended PMT) for the visible spectral region. An ozone-free PowerArc energy 75 W xenon lamp was used as the excitation source. The emission spectra were corrected according to the optical system of the emission monochromator and the photomultiplier response while the excitation spectrum was corrected in real time according to the lamp intensity and the optical system of the excitation monochromator using a silicon diode as a reference.

**Temperature-dependent luminescence.** Excitation and emission spectra from 9 K to 320 K were measured in the previously mentioned Quanta Master. To control the temperature, a Janis cryostat (CCS-100/204N model) and a Lake Shore temperature controller (model 335) were used.

**Magnetism.** DC and AC measurements for **1** and **2** were performed using a Quantum Design MPMS3 with 11.6 mg of **1** or 22.1 mg of **2** the crystalline sample, which was restrained with silicon grease and wrapped in a polyethylene membrane. The magnetization data were collected at 100 K to confirm the absence of ferromagnetic impurities. Diamagnetic corrections were applied for the sample holder, and the inherent diamagnetism of the sample was estimated with the use of Pascals constants. In order to extend the probed temperature range, AC susceptibility between 1000 Hz – 10 000 Hz was measured on the same sample using a Quantum D Design Physical Property Measurement System (Dynacool-14T) equipped with a vibrating sample magnetometer (VSM).

## Supplementary note S2 - Crystallographic data

**Table S1.** Crystallographic data of [Dy<sub>2</sub>bpm(hexd)<sub>6</sub>] (**1**) and [Dy<sub>2</sub>bpm(hpd)<sub>6</sub>] (**2**).

|                                                                        | <b>1</b>                                                                       | <b>2</b>                                                                       |
|------------------------------------------------------------------------|--------------------------------------------------------------------------------|--------------------------------------------------------------------------------|
| CCDC deposition number                                                 | 2353555                                                                        | 2353556                                                                        |
| Empirical formula                                                      | C <sub>44</sub> H <sub>60</sub> Dy <sub>2</sub> N <sub>4</sub> O <sub>12</sub> | C <sub>50</sub> H <sub>72</sub> Dy <sub>2</sub> N <sub>4</sub> O <sub>12</sub> |
| Molecular weight, g mol <sup>-1</sup>                                  | 1161.96                                                                        | 1246.11                                                                        |
| Temperature, K                                                         | 200                                                                            | 200                                                                            |
| Wavelength, Å                                                          | 0.71073                                                                        | 0.71073                                                                        |
| Crystal system                                                         | Triclinic                                                                      | Triclinic                                                                      |
| Space group                                                            | <i>P</i> $\bar{1}$                                                             | <i>P</i> $\bar{1}$                                                             |
| <i>a</i> , Å                                                           | 9.2504(9)                                                                      | 9.3079(6)                                                                      |
| <i>b</i> , Å                                                           | 10.1281(10)                                                                    | 11.8110(8)                                                                     |
| <i>c</i> , Å                                                           | 14.0753(14)                                                                    | 13.0703(9)                                                                     |
| $\alpha$ , °                                                           | 91.315(2)                                                                      | 69.970(1)                                                                      |
| $\beta$ , °                                                            | 102.365(2)                                                                     | 84.764(2)                                                                      |
| $\gamma$ , °                                                           | 108.821(2)                                                                     | 80.764(2)                                                                      |
| Volume                                                                 | 1213.2                                                                         | 1331.46(16)                                                                    |
| No. of formula units/unit cell, Z                                      | 1                                                                              | 1                                                                              |
| Density ( $\rho$ ), g cm <sup>-3</sup> calc'd.                         | 1.590                                                                          | 1.554                                                                          |
| Absorption coefficient ( $\mu$ ) mm <sup>-1</sup>                      | 3.117                                                                          | 2.846                                                                          |
| F(0 0 0)                                                               | 580.0                                                                          | 628.0                                                                          |
| Crystal size, mm <sup>3</sup>                                          | 0.14 × 0.09 × 0.02                                                             | 0.06 × 0.06 × 0.02                                                             |
| Minimum and maximum transmittance                                      | 0.667, 0.746                                                                   | 0.655, 0.745                                                                   |
| Theta range, °                                                         | 1.488 - 28.373                                                                 | 1.660 - 26.405                                                                 |
| Index ranges (h k l)                                                   | (12 13 18)                                                                     | (11 14 16)                                                                     |
| No. of reflections measured                                            | 18083                                                                          | 16998                                                                          |
| No. of independent reflections                                         | 6067                                                                           | 5442                                                                           |
| R(int)                                                                 | 0.049                                                                          | 0.092                                                                          |
| Completeness, %                                                        | 0.999                                                                          | 0.995                                                                          |
| Data / restraints / parameters                                         | 6067 / 227 / 337                                                               | 5442 / 118 / 364                                                               |
| R1, wR <sup>2</sup> ( <i>I</i> > 2 $\sigma$ ( <i>I</i> )) <sup>a</sup> | 0.0341, 0.0582                                                                 | 0.0478, 0.0631                                                                 |
| R1, wR <sup>2</sup> (all data)                                         | 0.0522, 0.0636                                                                 | 0.0881, 0.0733                                                                 |
| Goodness of fit on F <sup>2</sup>                                      | 1.003                                                                          | 1.018                                                                          |
| Largest differential peak and hole, e/Å <sup>3</sup>                   | 1.73, -0.62                                                                    | 2.12, -1.51                                                                    |

**Table S2.** Intramolecular and intermolecular Dy ... Dy distances (Å) in **1** and **2**.

| Distance / Å                      | <b>1</b>  | <b>2</b>  |
|-----------------------------------|-----------|-----------|
| Intramolecular Dy ... Dy distance | 6.8111(5) | 6.8267(5) |
| Intermolecular Dy ... Dy distance | 7.2849(6) | 7.4805(5) |

**Table S3.** Dy – N and Dy – O bond distances (Å) in the first coordination sphere of **1** and **2**.

| Bond distances / Å | 1          | 2          |
|--------------------|------------|------------|
| Dy – N1            | 2.5842(26) | 2.5858(48) |
| Dy – N2            | 2.6164(26) | 2.6120(36) |
| Dy – O1            | 2.3145(29) | 2.3271(33) |
| Dy – O2            | 2.2924(29) | 2.2998(39) |
| Dy – O3            | 2.3281(27) | 2.3068(37) |
| Dy – O4            | 2.3337(33) | 2.2815(36) |
| Dy – O5            | 2.3169(22) | 2.3106(37) |
| Dy – O6            | 2.3085(33) | 2.3199(38) |
| Average Dy – O     | 2.3157     | 2.3076     |

**Table S4.** Bite angles (°) in **1** and **2**.

| Bond Angles / ° | 1          | 2           |
|-----------------|------------|-------------|
| N1 – Dy – N2    | 62.496(90) | 62.216(125) |
| O1 – Dy – O2    | 74.000(94) | 72.991(131) |
| O3 – Dy – O4    | 73.352(93) | 75.083(131) |
| O5 – Dy – O6    | 73.951(96) | 73.444(131) |

**Table S5.** Shape analysis of the Dy<sup>III</sup> polyhedra in **1** and **2** using SHAPE 2.1.<sup>6</sup> Values in the table are the continuous shape measures (CSHM, dimensionless) for each idealized geometry.

| Idealized geometry                         | Short name | Point group | 1            | 2            |
|--------------------------------------------|------------|-------------|--------------|--------------|
| Square antiprism                           | SAPR-8     | $D_{4d}$    | <b>0.617</b> | <b>0.695</b> |
| Biaugmented trigonal prism                 | BTPR-8     | $C_{2v}$    | 2.117        | 2.226        |
| Triangular dodecahedron                    | TDD-8      | $D_{2d}$    | 2.473        | 2.502        |
| Biaugmented trigonal prism J50             | JBTPR-8    | $C_{2v}$    | 2.716        | 2.845        |
| Snub diphenoid J84                         | JSD-8      | $D_{2d}$    | 5.213        | 5.142        |
| Cube                                       | CU-8       | $Oh$        | 9.043        | 8.681        |
| Triakis tetrahedron                        | TT-8       | $Td$        | 9.799        | 9.421        |
| Hexagonal bipyramid                        | HBPY-8     | $D_{6h}$    | 15.832       | 15.285       |
| Johnson gyrobifastigium J26                | JGBF-8     | $D_{2d}$    | 15.817       | 15.696       |
| Heptagonal pyramid                         | HPY-8      | $C_{7v}$    | 21.733       | 22.013       |
| Elongated trigonal bipyramid               | ETBPY-8    | $D_{3h}$    | 23.625       | 24.106       |
| Johnson elongated triangular bipyramid J14 | JETBPY-8   | $D_{3h}$    | 27.418       | 28.094       |
| Octagon                                    | OP-8       | $D_{8h}$    | 29.401       | 30.384       |

**Table S6.** Skew angle ( $\phi$ ), magic angle ( $\alpha$ ), average distances between the coordination atoms in each plane ( $d_{in}$ ), interplanar distance ( $d_{pp}$ ), and dihedral angle ( $\theta$ ) between the upper and lower planes for the Dy<sup>III</sup> coordination polyhedron compared to an ideal SAP coordination in **1** and **2**.

| Parameters                         | 1      | 2      | Ideal SAP         |
|------------------------------------|--------|--------|-------------------|
| Skew angle ( $\phi$ ) / °          | 45.008 | 45.002 | 45                |
| Compression angle ( $\alpha$ ) / ° | 57.360 | 57.735 | 54.74             |
| $d_{in}$ / Å                       | 2.836  | 2.809  | $d_{in} = d_{pp}$ |
| $d_{pp}$ / Å                       | 2.557  | 2.603  |                   |
| $\theta$ / °                       | 1.370  | 0.699  | 0                 |

Skew angle ( $\phi$ ) = the angle between the diagonals of the two planes, calculated as an average; magic or compression angle ( $\alpha$ ) = the angle between the  $S_8$  axis and a Dy - ligand direction, calculated as an average. The  $S_8$  axis was considered as the line between the centroids of the upper and lower planes;  $d_{in}$  = the average distances between the coordination atoms in each plane defined in the coordination polyhedron;  $d_{pp}$  = the interplanar distance, calculated by defining the centroids of the upper and lower planes and then measuring the distances between centroids;  $\theta$  = the dihedral angle between the upper and lower planes.

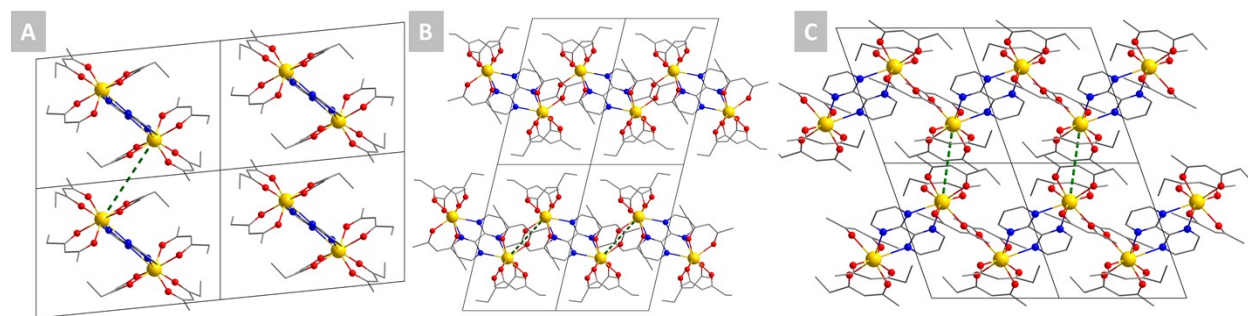

**Figure S4.** View of the packing arrangement along the crystallographic (a) *a*, (b) *b*, and (c) *c*-axis in **1**. Green dashed lines represent the shortest Dy ··· Dy intermolecular distance.

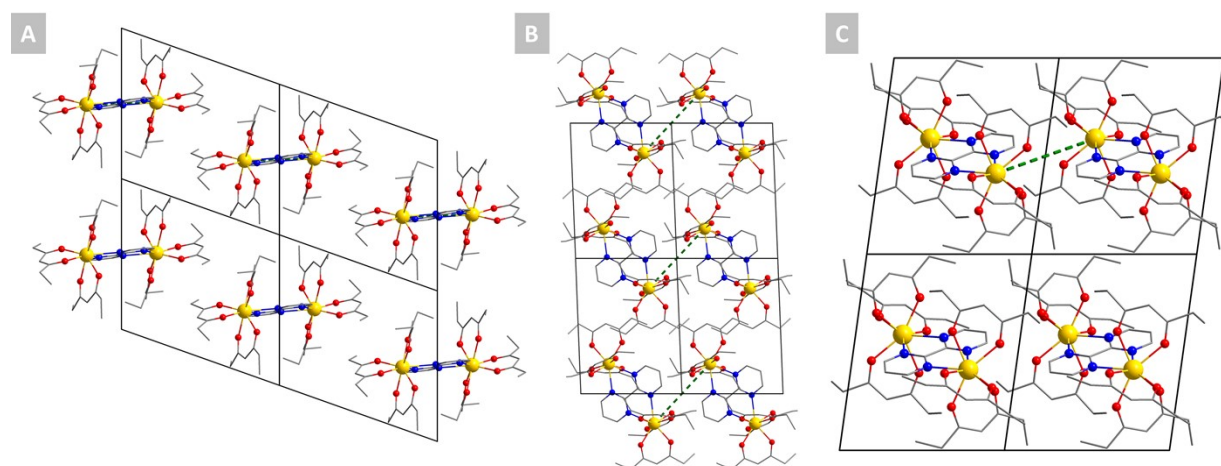

**Figure S5.** View of the packing arrangement along the crystallographic (a) *a*, (b) *b*, and (c) *c*-axis in **2**. Green dashed lines represent the shortest Dy ··· Dy intermolecular distance.



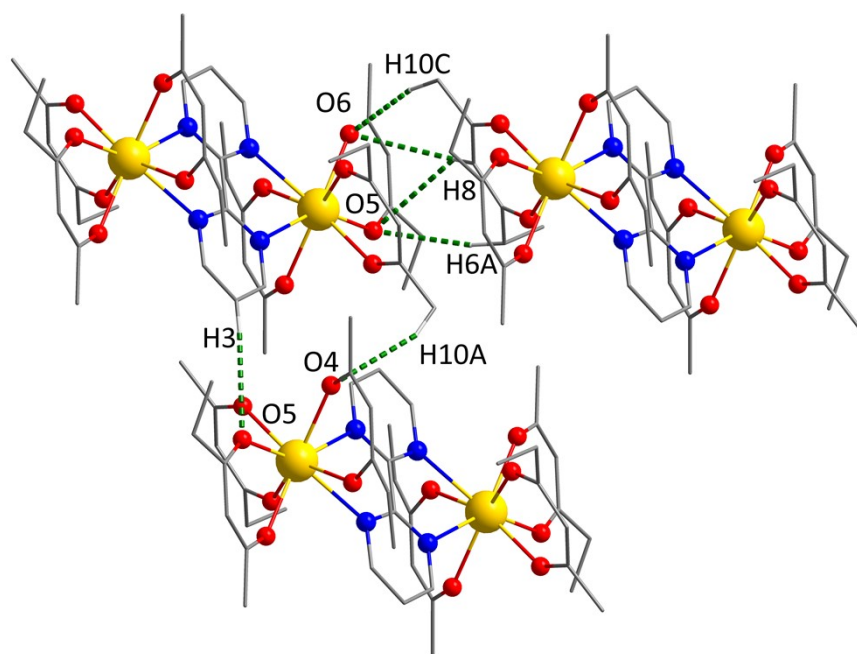

**Figure S6.** Representation of the intermolecular H-bonds (dashed green lines) in **1**.

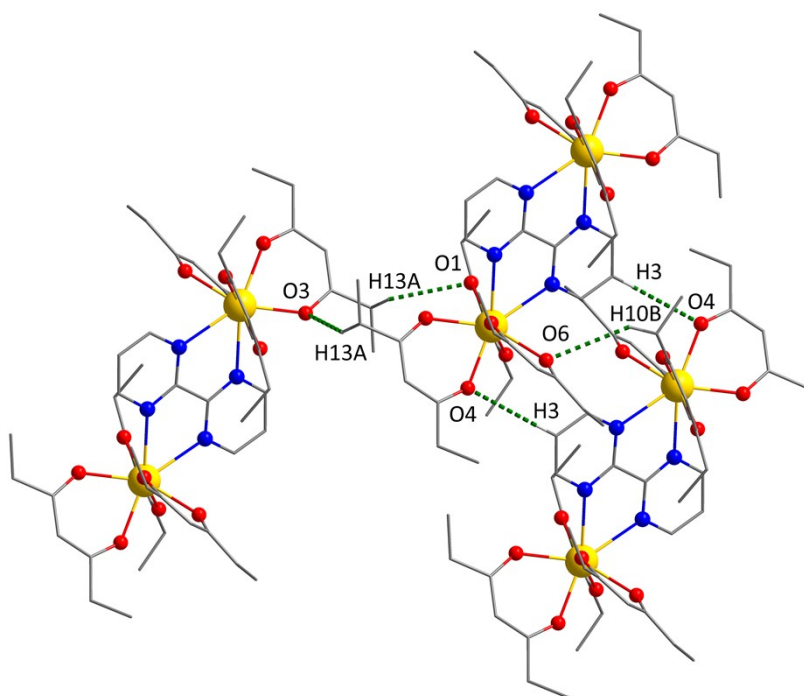

**Figure S7.** Representation of the intermolecular H-bonds (dashed green lines) in **2**.

**Table S7.** Intermolecular H-bond distances (Å) in **1** and **2**.

| <b>1</b>           |            | <b>2</b>           |            |
|--------------------|------------|--------------------|------------|
| <b>H3 ... O5</b>   | 2.9243(33) | <b>H3 ... O4</b>   | 2.9405(36) |
| <b>H10A ... O4</b> | 2.8408(27) | <b>H10B ... O6</b> | 3.0577(40) |
| <b>H10C ... O6</b> | 2.5400(30) | <b>H13A ... O1</b> | 2.8630(40) |
| <b>H8 ... O6</b>   | 2.9097(26) | <b>H13A ... O3</b> | 2.6950(38) |
| <b>H8 ... O5</b>   | 3.2420(31) |                    |            |
| <b>H6A ... O5</b>  | 2.7336(26) |                    |            |

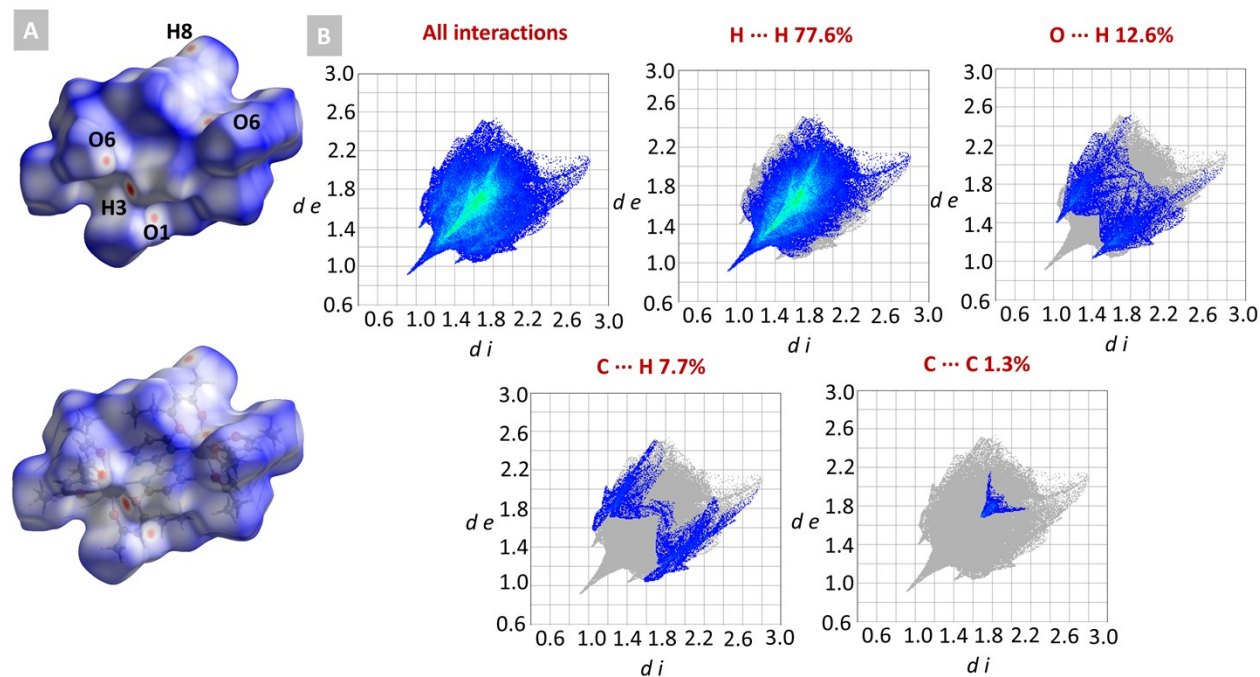

**Figure S8.** Hirshfeld surface (HS) of **1** mapped over  $d_{norm}$  and shape index,  $S$ . In the  $d_{norm}$  HS, a red–blue–white colour scheme was used, whereas red regions represent closer contacts, blue regions represent longer ones, and white regions represent the distance of contacts which is exactly equal to the  $vdW$  separation. (b) The 2D fingerprint plots of interatomic interactions of **1**, showing the percentages of contacts contributed to the total Hirshfeld surface area of the molecules.

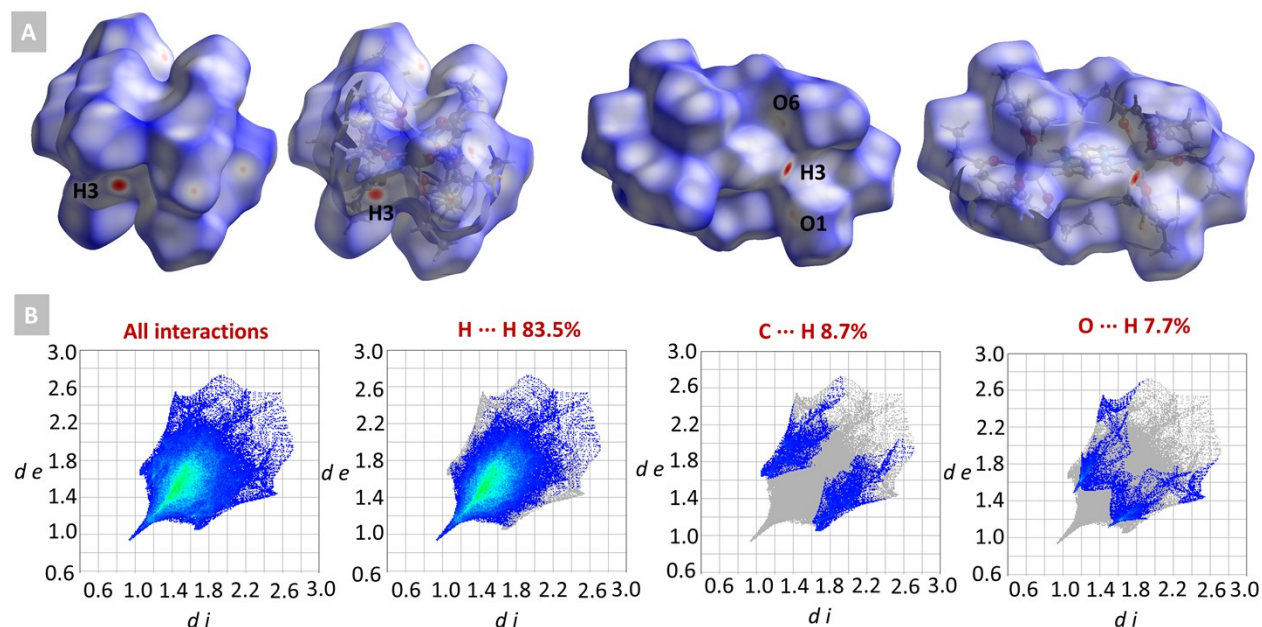

**Figure S9.** Hirshfeld surface (HS) of **2** mapped over  $d_{norm}$  and shape index,  $S$ . In the  $d_{norm}$  HS, a red–blue–white colour scheme was used, whereas red regions represent closer contacts, blue regions represent longer ones, and white regions represent the distance of contacts which is exactly equal to the  $vdW$  separation. Figure (a) also represents different visualisation angles of the HS. (b) The 2D fingerprint plots of interatomic interactions of **2**, showing the percentages of contacts contributed to the total Hirshfeld surface area of the molecules.

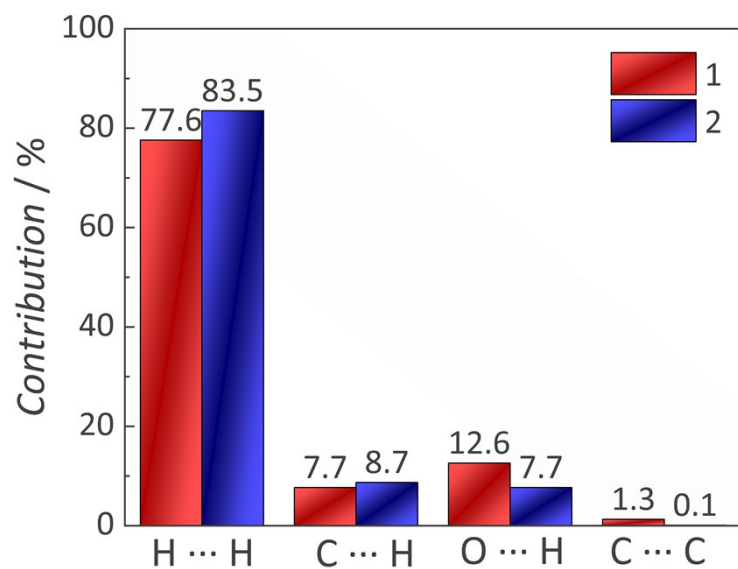

**Figure S10.** Percentages of contacts that contribute to the total Hirshfeld surface area of the molecules in **1** and **2**.

**Supplementary note S3 – Steady state luminescence**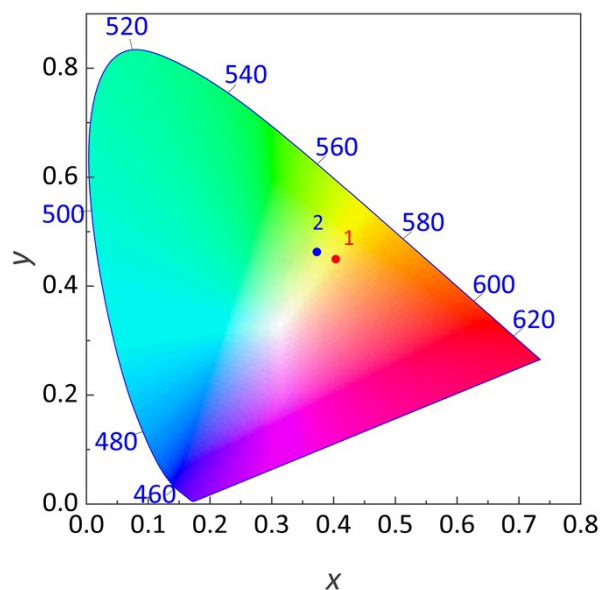

**Figure S11.** 1931 *Commission internationale de l'éclairage* (CIE) colour coordinate diagram calculated from the emission spectrum of **1** and **2**. The CIE colour coordinates of **1** and **2** are (0.40353;0.44959) and (0.37292; 0.46285), respectively.

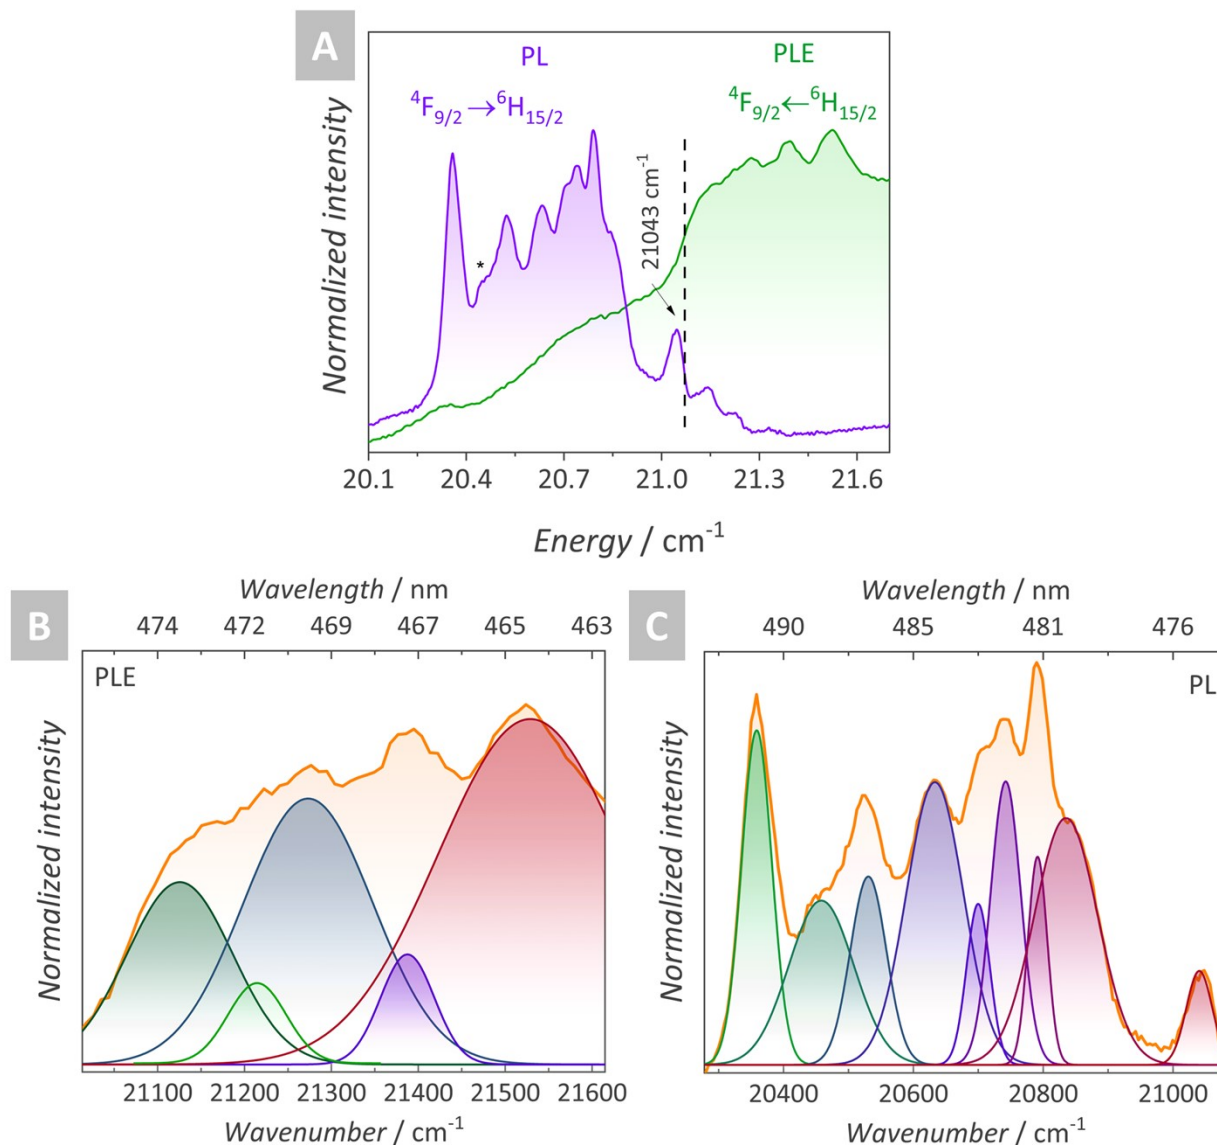

**Figure S12.** (a) Excitation (PLE,  $\lambda_{em} = 575$  nm) and emission (PL,  $\lambda_{exc} = 305$  nm) spectra at 10 K of **1** representing the  ${}^4F_{9/2} \leftarrow {}^6H_{15/2}$  and  ${}^4F_{9/2} \rightarrow {}^6H_{15/2}$  transitions, respectively, used to estimate the energy diagram represented in Figure 2b. Deconvolution of the bands assigned to the (b)  ${}^4F_{9/2} \leftarrow {}^6H_{15/2}$  and (c)  ${}^4F_{9/2} \rightarrow {}^6H_{15/2}$  transitions by applying a gaussian function ( $R^2 > 0.99$ ). The partial energy level diagram was determined as follows: As a consequence of the CF splitting,  $(J+1/2) M_J$  (KDs) components are expected for each  ${}^{2S+1}L_J$  level. In the case of the  ${}^6H_{15/2}$  ground level, 8  $M_J$  components are expected in the emission spectrum (assuming that only the first  $M_J$  sublevel arising from the  ${}^4F_{9/2}$  emitting level is populated). Yet, additional signals are observed (denoted with\* and named as “hot bands”), suggesting that the two lower-energy  $M_J$  of the emitting  ${}^4F_{9/2}$  level are populated. Due to the low temperature and according to the Boltzmann distribution, the components arising from the upper energy  $M_J$  excited level should render lower intensity emission bands. In light of this guidance, an energetic difference between the  $M_J$  sublevels of the ground and emitting levels was obtained, Table S9.

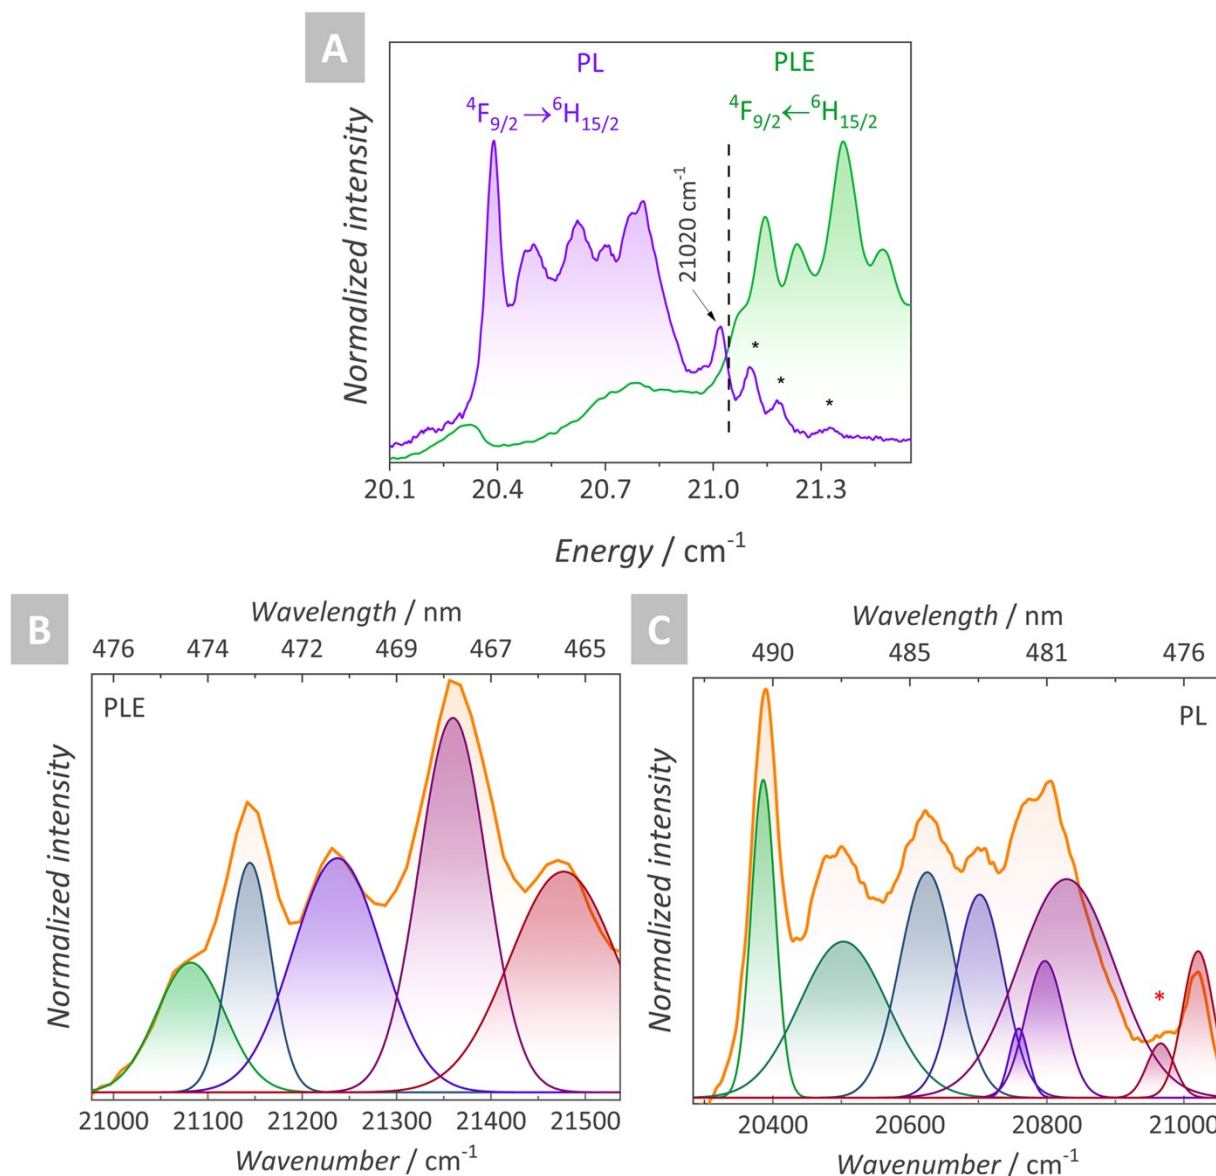

**Figure S13.** (a) Excitation (PLE,  $\lambda_{em} = 575$  nm) and emission (PL,  $\lambda_{exc} = 305$  nm) spectra at 10 K of **2** representing the  ${}^4F_{9/2} \leftarrow {}^6H_{15/2}$  and  ${}^4F_{9/2} \rightarrow {}^6H_{15/2}$  transitions, respectively, used to estimate the energy diagram represented in Figure 2b. Deconvolution of the bands assigned to the (b)  ${}^4F_{9/2} \leftarrow {}^6H_{15/2}$  and (c)  ${}^4F_{9/2} \rightarrow {}^6H_{15/2}$  transitions by applying a gaussian function ( $R^2 > 0.99$ ).

**Table S8.** Relative energies of the Stark sublevels ( $M_J$  or KDs) of the  ${}^6\text{H}_{15/2}$  and  ${}^4\text{F}_{9/2}$   $\text{Dy}^{\text{III}}$  levels obtained from the experimental luminescence data of **1** and **2**.  $\Delta E$  is the energy difference between the KD and the other closest lower energy KD.

|                                                                                   | Relative energy / $\text{cm}^{-1}$ | $\Delta E$ / $\text{cm}^{-1}$ | Relative energy / $\text{cm}^{-1}$ | $\Delta E$ / $\text{cm}^{-1}$ |
|-----------------------------------------------------------------------------------|------------------------------------|-------------------------------|------------------------------------|-------------------------------|
| <b><math>\text{Dy}^{\text{III}}</math> <math>{}^6\text{H}_{15/2}</math> level</b> | <b>1</b>                           |                               | <b>2</b>                           |                               |
| KD1                                                                               | 0                                  | 0                             | 0                                  | 0                             |
| KD2                                                                               | 200 $\pm$ 2                        | 200                           | 180 $\pm$ 4                        | 180                           |
| KD3                                                                               | 255 $\pm$ 2                        | 55                            | 219 $\pm$ 2                        | 39                            |
| KD4                                                                               | 304 $\pm$ 2                        | 49                            | 251 $\pm$ 3                        | 32                            |
| KD5                                                                               | 338 $\pm$ 3                        | 34                            | 321 $\pm$ 4                        | 70                            |
| KD6                                                                               | 410 $\pm$ 4                        | 72                            | 401 $\pm$ 2                        | 80                            |
| KD7                                                                               | 523 $\pm$ 2                        | 113                           | 525 $\pm$ 3                        | 124                           |
| KD8                                                                               | 686 $\pm$ 2                        | 163                           | 633 $\pm$ 3                        | 108                           |
| <b><math>\text{Dy}^{\text{III}}</math> <math>{}^4\text{F}_{9/2}</math> level</b>  |                                    |                               |                                    |                               |
| KD1                                                                               | 21157 $\pm$ 5                      | 0                             | 21068 $\pm$ 5                      | 0                             |
| KD2                                                                               | 21219 $\pm$ 3                      | 62                            | 21142 $\pm$ 2                      | 74                            |
| KD3                                                                               | 21278 $\pm$ 5                      | 59                            | 21229 $\pm$ 4                      | 87                            |
| KD4                                                                               | 21393 $\pm$ 2                      | 115                           | 21358 $\pm$ 3                      | 129                           |
| KD5                                                                               | 21521 $\pm$ 12                     | 125                           | 21470 $\pm$ 8                      | 112                           |



## Supplementary note S4 – Additional magnetic data

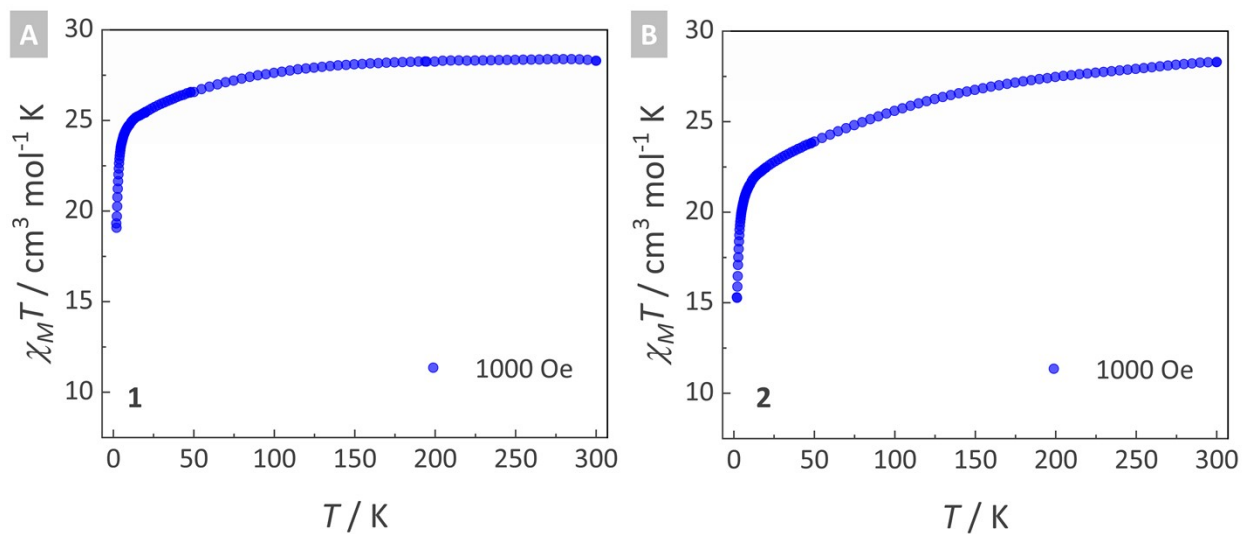

**Figure S14.** Temperature ( $T$ ) dependence plot of the magnetic susceptibility ( $\chi_M T$ ) under an applied field of 1000 Oe from 1.8 K to 300 K for (a) **1** and (b) **2**.

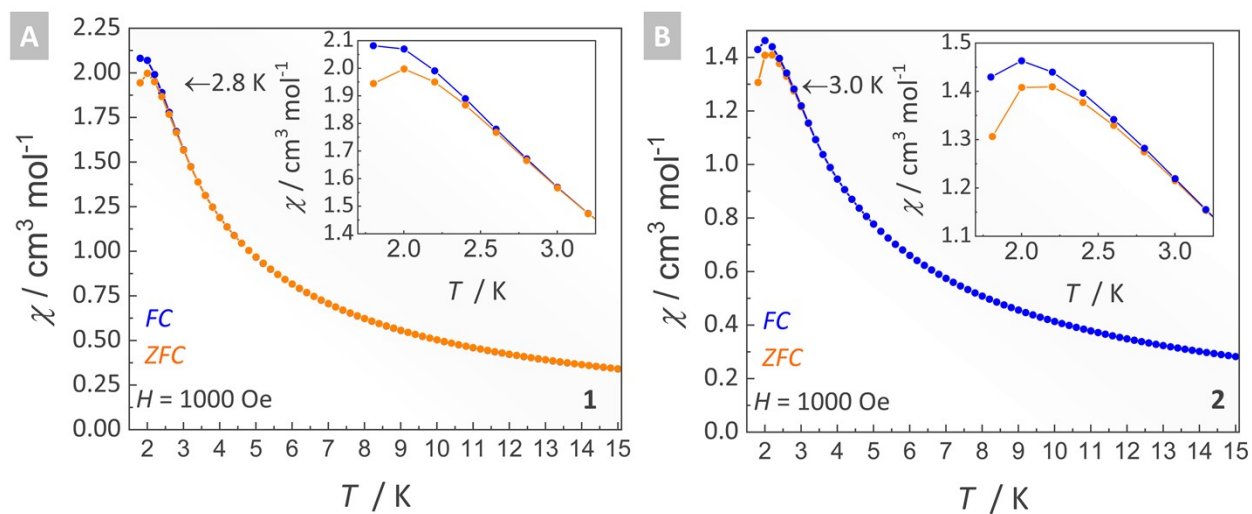

**Figure S15.** Zero-field-cooled-field-cooled (ZFCFC) measurements ( $1 \text{ K min}^{-1}$ ) for (a) **1** and (b) **2**.



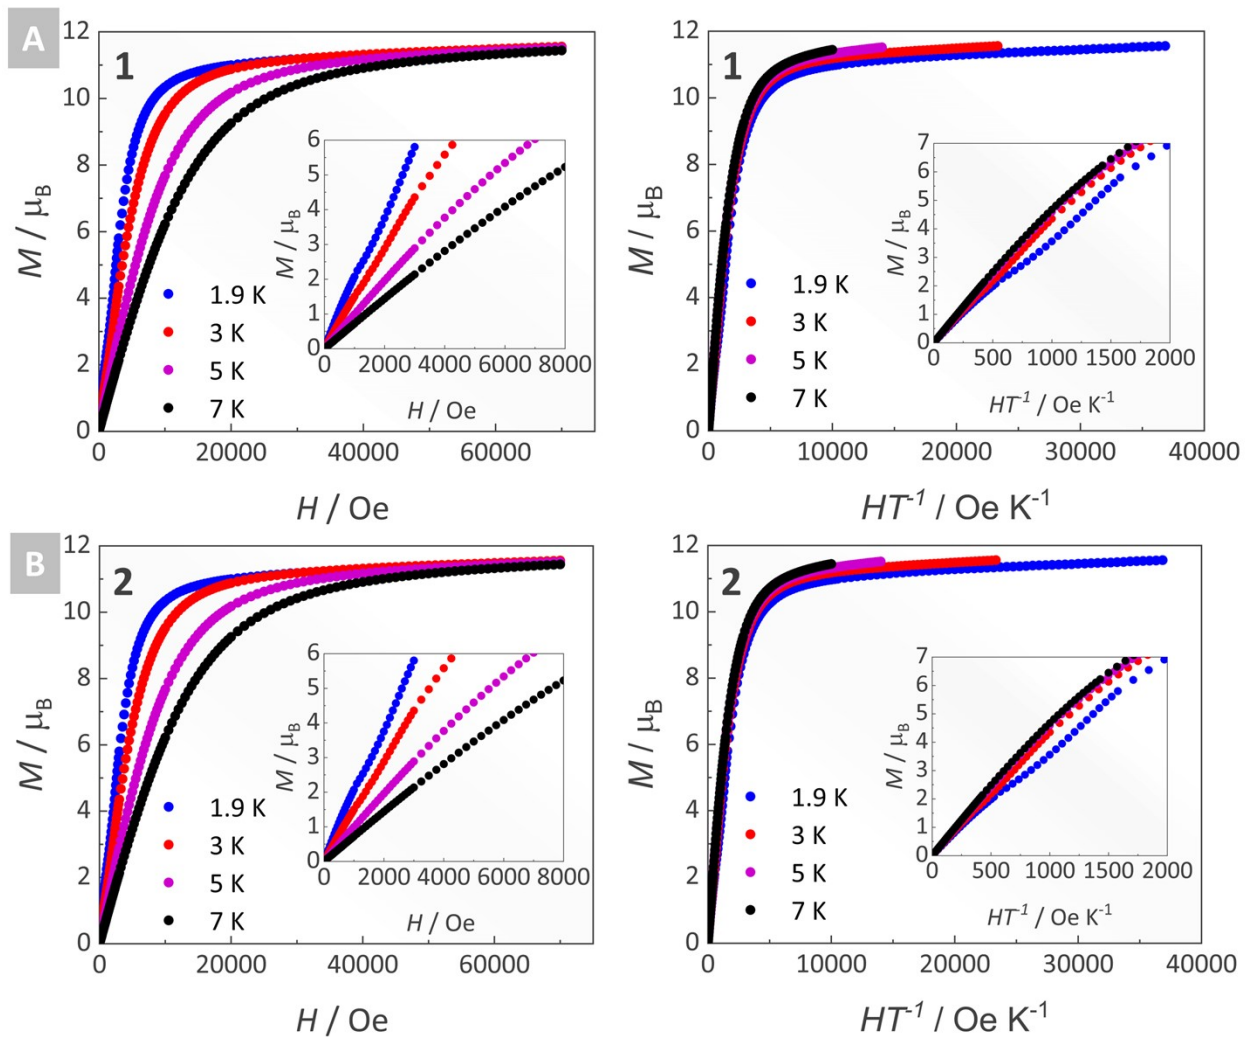

**Figure S16.** Field ( $H$ ) dependence plot of the (a) magnetization ( $M$ , left) and the reduced magnetization ( $HT^{-1}$ , right) at different temperatures (1.9, 3, 5, or 7 K) for (a) **1** and (b) **2**.

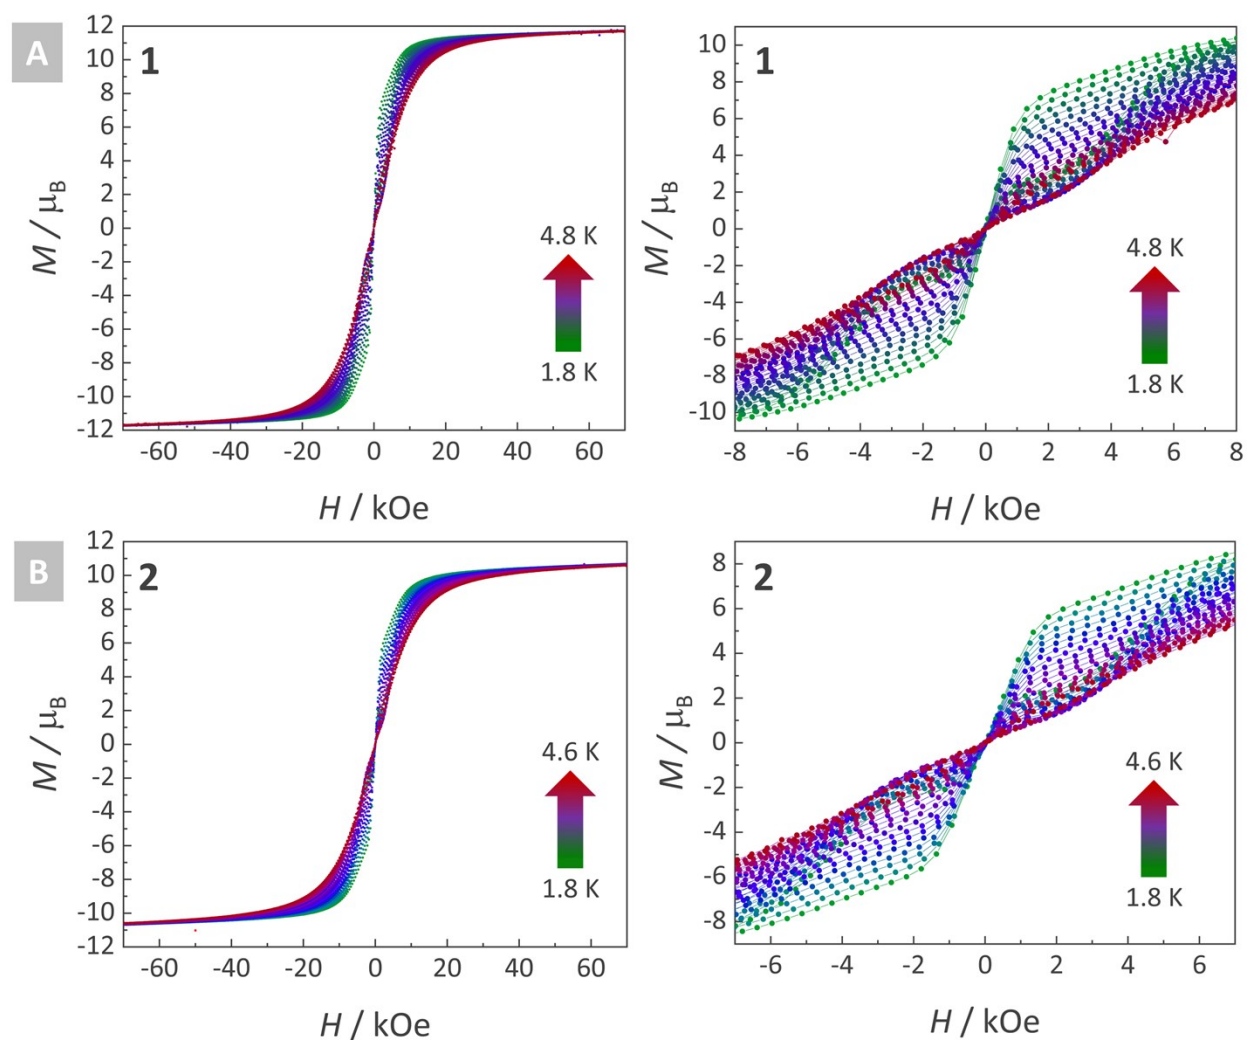

**Figure S17.** Magnetic hysteresis plot (magnetization *versus* applied field) (sweep rate of 25 Oe  $\text{s}^{-1}$ ) for (a) 1 and (b) 2.

### Alternating current (ac) measurements and data fitting

The  $\chi''$  susceptibility curves were fitted using the generalized single (eqn S1) or double (eqn S2) models, where  $\chi_t$  is the isothermal susceptibility,  $\chi_s$  the adiabatic susceptibility,  $\nu$  is the linear frequency,  $\tau$  is the relaxation time of the magnetization, and the  $\alpha$  parameter assumes values between 0 and 1 and gauges the distribution of the relaxation times.<sup>7</sup> The uncertainties of relaxation time parameter were calculated accordingly to D. Reta, N. F. Chilton.<sup>8</sup>

$$\chi'' = \frac{(\chi_t - \chi_s)(2\pi\nu\tau)^{(1-\alpha)}\cos\left(\frac{\alpha\pi}{2}\right)}{\left[1 + (2(2\pi\nu\tau)^{(1-\alpha)}\sin\left(\frac{\alpha\pi}{2}\right) + (2\pi\nu\tau)^{2(1-\alpha)}\right]} \quad (S1)$$

$$\chi'' = \frac{(\chi_t - \chi_s)(2\pi\nu\tau)^{(1-\alpha)}\cos\left(\frac{\alpha\pi}{2}\right)}{\left[1 + (2(2\pi\nu\tau)^{(1-\alpha)}\sin\left(\frac{\alpha\pi}{2}\right) + (2\pi\nu\tau)^{2(1-\alpha)}\right]} + \frac{(\chi_{tg} - \chi_{sg})(2\pi\nu\tau_g)^{(1-\alpha_g)}\cos\left(\frac{\alpha_g\pi}{2}\right)}{\left[1 + (2(2\pi\nu\tau_g)^{(1-\alpha_g)}\sin\left(\frac{\alpha_g\pi}{2}\right) + (2\pi\nu\tau_g)^{2(1-\alpha_g)}\right]} \quad (S2)$$

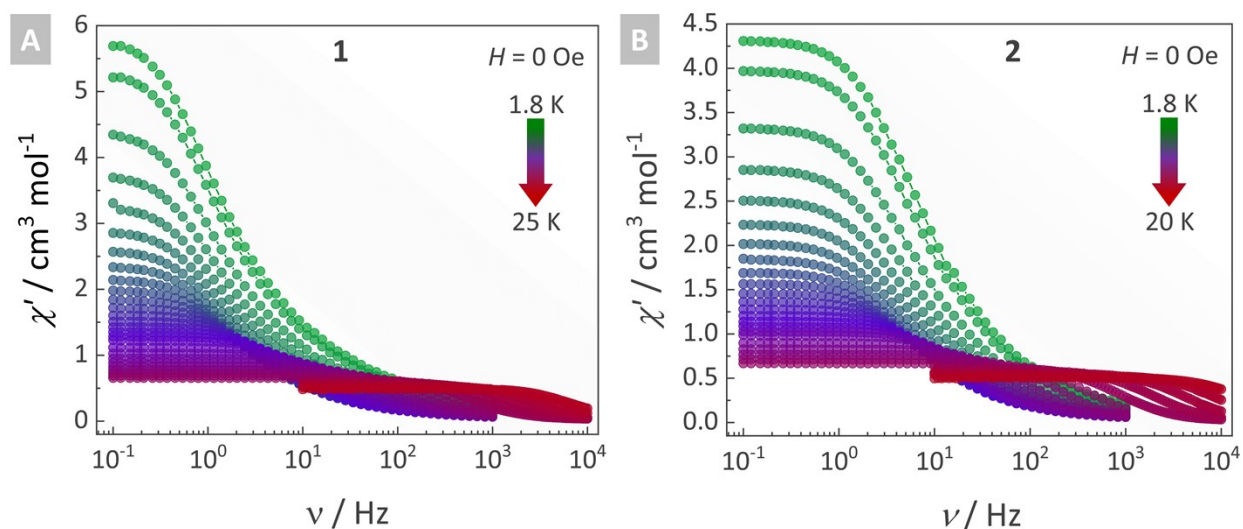

**Figure S18.** Frequency ( $\nu$ ) dependence of the in-phase ( $\chi'$ ) magnetic susceptibility as a function of temperature ( $T$ ) obtained at zero Oe for (a) **1** and (b) **2**.

**Table S9.** Best-fit parameters ( $\chi_s$ ,  $\chi_t$ ,  $\alpha$ ,  $\tau$ ) to the generalized single (7 – 25 K) or double (1.8 – 6.5 K) Debye model for the frequency ( $\nu$ ) dependence of the out-of-phase magnetic susceptibility ( $\chi''$ ) as a function of the temperature ( $T$ ) for **1**. Data collected at 0 Oe.

| $T$<br>K | $\chi_s$<br>$\text{cm}^3 \text{mol}^{-1}$ | $\chi_t$<br>$\text{cm}^3 \text{mol}^{-1}$ | $\alpha$ | $\tau$<br>s            | $\chi_{s2}$<br>$\text{cm}^3 \text{mol}^{-1}$ | $\chi_{t2}$<br>$\text{cm}^3 \text{mol}^{-1}$ | $\alpha_2$ | $\tau_2$<br>s |
|----------|-------------------------------------------|-------------------------------------------|----------|------------------------|----------------------------------------------|----------------------------------------------|------------|---------------|
|          | LF                                        |                                           |          |                        | HF                                           |                                              |            |               |
| 1.8      | 0.08479                                   | 3.09118                                   | 0.08523  | 0.16769                | 0.02039                                      | 2.75151                                      | 0.43162    | 0.02048       |
| 2        | 0.89758                                   | 3.65913                                   | 0.07363  | 0.16355                | 0.02039                                      | 2.45334                                      | 0.41563    | 0.01906       |
| 2.5      | 0.62478                                   | 2.9286                                    | 0.07737  | 0.15372                | 0.02093                                      | 2.01413                                      | 0.41585    | 0.01896       |
| 3        | 0.73513                                   | 2.69604                                   | 0.07674  | 0.14726                | 0.02093                                      | 1.72024                                      | 0.41396    | 0.01885       |
| 3.5      | 0.15322                                   | 1.88555                                   | 0.07187  | 0.14075                | 0.02093                                      | 1.45457                                      | 0.4011     | 0.01745       |
| 4        | 0.11536                                   | 1.67015                                   | 0.0752   | 0.13276                | 0.0053                                       | 1.28009                                      | 0.40334    | 0.01711       |
| 4.5      | 0.01039                                   | 1.43625                                   | 0.07298  | 0.12363                | 0.01155                                      | 1.1186                                       | 0.39741    | 0.01572       |
| 5        | 0.07758                                   | 1.41259                                   | 0.06859  | 0.11285                | 0.02092                                      | 0.96829                                      | 0.38807    | 0.01424       |
| 5.5      | 0.02093                                   | 1.23664                                   | 0.06582  | 0.09967                | 0.05274                                      | 0.91253                                      | 0.384      | 0.01313       |
| 6        | 0.03424                                   | 1.19872                                   | 0.05763  | 0.08619                | 0.01989                                      | 0.78379                                      | 0.3701     | 0.01172       |
| 6.5      | 0.06078                                   | 1.18342                                   | 0.05289  | 0.07197                | 0.07162                                      | 0.73265                                      | 0.35577    | 0.0098        |
| 7        | 0.0012                                    | 1.62152                                   | 0.208    | 0.05159                | -                                            | -                                            | -          | -             |
| 7.5      | 0.00433                                   | 1.68497                                   | 0.19212  | 0.03436                | -                                            | -                                            | -          | -             |
| 8        | 0.35788                                   | 1.78805                                   | 0.17738  | 0.02817                | -                                            | -                                            | -          | -             |
| 8.5      | 0.42849                                   | 1.77753                                   | 0.16347  | 0.02287                | -                                            | -                                            | -          | -             |
| 9        | 0.48546                                   | 1.76433                                   | 0.15141  | 0.01852                | -                                            | -                                            | -          | -             |
| 9.5      | 0.01139                                   | 1.22703                                   | 0.14174  | 0.01502                | -                                            | -                                            | -          | -             |
| 10       | 0.00765                                   | 1.1647                                    | 0.13449  | 0.01223                | -                                            | -                                            | -          | -             |
| 11       | 0.03794                                   | 1.09679                                   | 0.12205  | 0.00822                | -                                            | -                                            | -          | -             |
| 12       | 0.0383                                    | 1.0143                                    | 0.11005  | 0.0056                 | -                                            | -                                            | -          | -             |
| 13       | 0.00528                                   | 0.90817                                   | 0.09942  | 0.00388                | -                                            | -                                            | -          | -             |
| 14       | 0.00401                                   | 0.84535                                   | 0.09192  | 0.00274                | -                                            | -                                            | -          | -             |
| 15       | 0.01192                                   | 0.79537                                   | 0.08242  | 0.00194                | -                                            | -                                            | -          | -             |
| 16       | 0.006                                     | 0.73959                                   | 0.07558  | 0.00136                | -                                            | -                                            | -          | -             |
| 17       | 0.00558                                   | 0.69458                                   | 0.06636  | $9.434 \times 10^{-4}$ | -                                            | -                                            | -          | -             |
| 18       | 0.00112                                   | 0.6476                                    | 0.05568  | $6.425 \times 10^{-4}$ | -                                            | -                                            | -          | -             |
| 19       | 0.00546                                   | 0.61153                                   | 0.04557  | $4.289 \times 10^{-4}$ | -                                            | -                                            | -          | -             |
| 20       | 0.016                                     | 0.61737                                   | 0.07334  | $2.622 \times 10^{-4}$ | -                                            | -                                            | -          | -             |
| 21       | 0.02805                                   | 0.604                                     | 0.06858  | $1.653 \times 10^{-4}$ | -                                            | -                                            | -          | -             |
| 22       | 0.00116                                   | 0.54885                                   | 0.06208  | $1.022 \times 10^{-4}$ | -                                            | -                                            | -          | -             |
| 23       | 0.00173                                   | 0.51773                                   | 0.05431  | $6.256 \times 10^{-5}$ | -                                            | -                                            | -          | -             |
| 24       | 0.00348                                   | 0.49274                                   | 0.05711  | $3.782 \times 10^{-5}$ | -                                            | -                                            | -          | -             |
| 25       | 0.00581                                   | 0.46448                                   | 0.0385   | $2.411 \times 10^{-5}$ | -                                            | -                                            | -          | -             |

**Table S10.** Best-fit parameters ( $\chi_s$ ,  $\chi_t$ ,  $\alpha$ ,  $\tau$ ) to the generalized single (7 – 20 K) or double (1.8 – 6.5 K) Debye model for the frequency ( $\nu$ ) dependence of the out-of-phase magnetic susceptibility ( $\chi''$ ) as a function of the temperature ( $T$ ) for **2**. Data collected at 0 Oe.

| $T$<br>K | $\chi_s$<br>$\text{cm}^3 \text{mol}^{-1}$ | $\chi_t$<br>$\text{cm}^3 \text{mol}^{-1}$ | $\alpha$ | $\tau$<br>s           | $\chi_{s2}$<br>$\text{cm}^3 \text{mol}^{-1}$ | $\chi_{t2}$<br>$\text{cm}^3 \text{mol}^{-1}$ | $\alpha_2$ | $\tau_2$<br>s |
|----------|-------------------------------------------|-------------------------------------------|----------|-----------------------|----------------------------------------------|----------------------------------------------|------------|---------------|
|          | LF                                        |                                           |          |                       | HF                                           |                                              |            |               |
| 1.8      | 0.12253                                   | 1.93771                                   | 0.06386  | 0.03844               | 0.00203                                      | 2.34863                                      | 0.30152    | 0.00689       |
| 2        | 0.05536                                   | 1.67393                                   | 0.06091  | 0.04114               | 0.02123                                      | 2.22467                                      | 0.30051    | 0.00754       |
| 2.5      | 0.03329                                   | 1.50674                                   | 0.07419  | 0.04331               | 0.02191                                      | 1.74971                                      | 0.30676    | 0.00768       |
| 3        | 0.01179                                   | 1.33952                                   | 0.08215  | 0.04481               | 0.0209                                       | 1.44973                                      | 0.31105    | 0.00778       |
| 3.5      | 0.02202                                   | 1.1915                                    | 0.08663  | 0.04579               | 0.00804                                      | 1.26245                                      | 0.31422    | 0.00799       |
| 4        | 0.02039                                   | 1.0591                                    | 0.08743  | 0.04726               | 0.02058                                      | 1.1398                                       | 0.31262    | 0.00818       |
| 4.5      | 0.26669                                   | 1.24034                                   | 0.08303  | 0.04695               | 0.02093                                      | 0.99325                                      | 0.31218    | 0.00809       |
| 5        | 0.1252                                    | 1.03548                                   | 0.07903  | 0.04524               | 0.02039                                      | 0.88198                                      | 0.30993    | 0.00779       |
| 5.5      | 0.02039                                   | 0.86659                                   | 0.07201  | 0.0419                | 0.04109                                      | 0.81707                                      | 0.30417    | 0.00718       |
| 6        | 0.01306                                   | 0.82441                                   | 0.05803  | 0.03793               | 0.00265                                      | 0.70965                                      | 0.29333    | 0.00676       |
| 6.5      | 0.01092                                   | 0.7924                                    | 0.04749  | 0.0325                | 0.00248                                      | 0.62189                                      | 0.28428    | 0.00584       |
| 7        | 0.05082                                   | 1.35124                                   | 0.20337  | 0.02024               | -                                            | -                                            | -          | -             |
| 7.5      | 0.00179                                   | 1.21513                                   | 0.18041  | 0.01677               | -                                            | -                                            | -          | -             |
| 8        | 0.02039                                   | 1.17014                                   | 0.16606  | 0.0124                | -                                            | -                                            | -          | -             |
| 8.5      | 0.02399                                   | 1.10857                                   | 0.14801  | 0.01027               | -                                            | -                                            | -          | -             |
| 9        | 0.04061                                   | 1.06694                                   | 0.13046  | 0.00846               | -                                            | -                                            | -          | -             |
| 9.5      | 0.0023                                    | 0.97455                                   | 0.11659  | 0.00687               | -                                            | -                                            | -          | -             |
| 10       | 0.02309                                   | 0.952                                     | 0.10436  | 0.00559               | -                                            | -                                            | -          | -             |
| 11       | 0.00216                                   | 0.85595                                   | 0.08587  | 0.00369               | -                                            | -                                            | -          | -             |
| 12       | 0.00209                                   | 0.78699                                   | 0.0738   | 0.00238               | -                                            | -                                            | -          | -             |
| 13       | 0.0041                                    | 0.73262                                   | 0.07192  | 0.00145               | -                                            | -                                            | -          | -             |
| 14       | 0.00496                                   | 0.68424                                   | 0.07043  | $8.138 \cdot 10^{-4}$ | -                                            | -                                            | -          | -             |
| 15       | 0.00666                                   | 0.63421                                   | 0.06978  | $4.202 \cdot 10^{-4}$ | -                                            | -                                            | -          | -             |
| 16       | 0.00202                                   | 0.60895                                   | 0.10247  | $1.845 \cdot 10^{-4}$ | -                                            | -                                            | -          | -             |
| 17       | 0.00209                                   | 0.57846                                   | 0.09427  | $8.186 \cdot 10^{-5}$ | -                                            | -                                            | -          | -             |
| 18       | 0.01692                                   | 0.56111                                   | 0.07709  | $3.739 \cdot 10^{-5}$ | -                                            | -                                            | -          | -             |
| 19       | 0.00204                                   | 0.51303                                   | 0.0669   | $1.818 \cdot 10^{-5}$ | -                                            | -                                            | -          | -             |
| 20       | 0.00204                                   | 0.50051                                   | 0.06096  | $8.769 \cdot 10^{-6}$ | -                                            | -                                            | -          | -             |

**Table S11.** Summary of the fitting parameters of the temperature ( $T$ ) dependence of the relaxation rate of magnetization ( $\tau^{-1}$ ) at 0 Oe and 1800 Oe for **1** and 0 Oe and 1600 Oe for **2**.

|        |                                   | 1                                    |                            |                                       | 2                                    |                            |                                      |
|--------|-----------------------------------|--------------------------------------|----------------------------|---------------------------------------|--------------------------------------|----------------------------|--------------------------------------|
|        |                                   | 0 Oe - LF                            | 0 Oe - HF                  | 1800 Oe                               | 0 Oe - LF                            | 0 Oe - HF                  | 1600 Oe                              |
| Orbach | $U_{eff}$                         | 290±7 K<br>(201±5 $\text{cm}^{-1}$ ) | -                          | 335±11 K<br>(232±8 $\text{cm}^{-1}$ ) | 283±9 K<br>(196±6 $\text{cm}^{-1}$ ) | -                          | 288±6 K<br>(200±4 $\text{cm}^{-1}$ ) |
|        | $\tau_0 / \text{s}$               | $4.2 \pm 0.3 \cdot 10^{-10}$         | -                          | $4.3 \pm 0.1 \cdot 10^{-11}$          | $6.7 \pm 0.7 \cdot 10^{-12}$         | -                          | $4.7 \pm 0.1 \cdot 10^{-12}$         |
| Raman  | $c / \text{s}^{-1} \text{K}^{-n}$ | $3.6 \pm 0.3 \cdot 10^{-5}$          | -                          | $1.6 \pm 0.1 \cdot 10^{-5}$           | $1.3 \pm 0.3 \cdot 10^{-4}$          | -                          | $2.0 \pm 0.02 \cdot 10^{-5}$         |
|        | $n$                               | $6.1 \pm 0.1$                        | -                          | $6.20 \pm 0.05$                       | $6.0 \pm 0.1$                        | -                          | $6.50 \pm 0.05$                      |
| QTM    | $\tau_{QTM} / \text{s}$           | $7.55 \pm 0.03$                      | $6.29 \pm 0.04 \cdot 10^2$ | -                                     | $2.20 \pm 0.04 \cdot 10^1$           | $1.30 \pm 0.04 \cdot 10^2$ | -                                    |

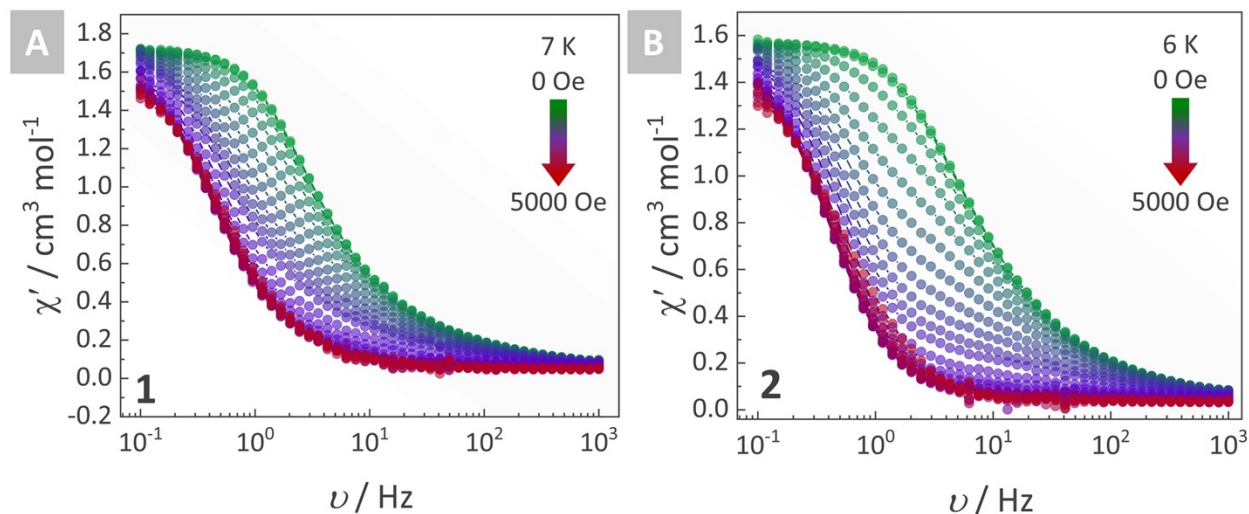

**Figure S19.** Frequency ( $\nu$ ) dependence of the in-phase ( $\chi'$ ) magnetic susceptibility as a function of applied field ( $H$ , from 0 Oe to 5000 Oe) (a) at 7 K for **1** and (b) at 6 K for **2**.

**Table S12.** Best-fit parameters ( $\chi_s$ ,  $\chi_t$ ,  $\alpha$ ,  $\tau$ ) to the generalized single (1800 – 5000 Oe) or double (0 – 1600 Oe) Debye model for the frequency ( $\nu$ ) dependence of the out-of-phase magnetic susceptibility ( $\chi''$ ) as a function of applied field ( $H$ ) at 7 K for **1**.

| $H$<br>Oe | $\chi_s$<br>$\text{cm}^3 \text{mol}^{-1}$ | $\chi_t$<br>$\text{cm}^3 \text{mol}^{-1}$ | $\alpha$ | $\tau^{-1}$<br>$\text{s}^{-1}$ | $\chi_s$<br>$\text{cm}^3 \text{mol}^{-1}$ | $\chi_t$<br>$\text{cm}^3 \text{mol}^{-1}$ | $\alpha$ | $\tau$<br>s |
|-----------|-------------------------------------------|-------------------------------------------|----------|--------------------------------|-------------------------------------------|-------------------------------------------|----------|-------------|
| HF        |                                           |                                           |          |                                | LF                                        |                                           |          |             |
| 0         | 0.10517                                   | 0.68765                                   | 0.33929  | 0.00829                        | 0.00621                                   | 1.08301                                   | 0.04651  | 0.05891     |
| 100       | $5.9867 \cdot 10^{-4}$                    | 0.5768                                    | 0.34424  | 0.00836                        | 0.03384                                   | 1.11679                                   | 0.05417  | 0.05958     |
| 200       | 0.0209                                    | 0.67034                                   | 0.33084  | 0.00962                        | $7.39849 \cdot 10^{-5}$                   | 0.99767                                   | 0.03859  | 0.07032     |
| 300       | $3.53131 \cdot 10^{-6}$                   | 0.67401                                   | 0.40991  | 0.015                          | 0.36949                                   | 1.37612                                   | 0.1188   | 0.07782     |
| 400       | 0.00521                                   | 0.72191                                   | 0.43734  | 0.02076                        | 0.34345                                   | 1.32177                                   | 0.14536  | 0.09891     |
| 500       | 0.00103                                   | 0.84401                                   | 0.39408  | 0.02794                        | 0.07015                                   | 0.90246                                   | 0.10158  | 0.15559     |
| 600       | 0.01316                                   | 0.9353                                    | 0.39667  | 0.03959                        | 0.37458                                   | 1.12816                                   | 0.05821  | 0.20554     |
| 700       | 0.02019                                   | 0.88719                                   | 0.40332  | 0.04765                        | 0.31442                                   | 1.09833                                   | 0.04104  | 0.24197     |
| 800       | 0.02039                                   | 0.83069                                   | 0.4101   | 0.05474                        | 0.1074                                    | 0.94719                                   | 0.03901  | 0.2684      |
| 900       | 0.01029                                   | 0.76165                                   | 0.41559  | 0.0617                         | 0.25468                                   | 1.16389                                   | 0.04581  | 0.28766     |
| 1000      | 0.01002                                   | 0.72972                                   | 0.39983  | 0.07049                        | 0.30535                                   | 1.23292                                   | 0.03253  | 0.31054     |
| 1200      | 0.00146                                   | 0.58985                                   | 0.41657  | 0.08496                        | 0.15827                                   | 1.23416                                   | 0.05715  | 0.33043     |
| 1400      | 0.09172                                   | 0.54477                                   | 0.46341  | 0.12171                        | 0.09555                                   | 1.30664                                   | 0.07919  | 0.32627     |
| 1600      | 0.20625                                   | 0.54397                                   | 0.52203  | 0.13248                        | 0.00134                                   | 1.34299                                   | 0.09864  | 0.33        |
| 1800      | -                                         | -                                         | -        | -                              | 0.00736                                   | 1.64029                                   | 0.16278  | 0.3364      |
| 2000      | -                                         | -                                         | -        | -                              | 2.19195                                   | 3.81555                                   | 0.15392  | 0.34102     |
| 2200      | -                                         | -                                         | -        | -                              | 0.50801                                   | 2.10142                                   | 0.14093  | 0.33735     |
| 2400      | -                                         | -                                         | -        | -                              | 0.83633                                   | 2.43999                                   | 0.1409   | 0.33995     |
| 2600      | -                                         | -                                         | -        | -                              | 0.20237                                   | 1.79426                                   | 0.13837  | 0.3371      |
| 2800      | -                                         | -                                         | -        | -                              | 0.00743                                   | 1.61211                                   | 0.14828  | 0.33505     |
| 3000      | -                                         | -                                         | -        | -                              | 0.00854                                   | 1.58371                                   | 0.14002  | 0.32685     |
| 3500      | -                                         | -                                         | -        | -                              | $7.83611 \cdot 10^{-4}$                   | 1.55561                                   | 0.13774  | 0.31391     |
| 4000      | -                                         | -                                         | -        | -                              | 0.31191                                   | 1.82672                                   | 0.13068  | 0.29518     |
| 4500      | -                                         | -                                         | -        | -                              | 0.04219                                   | 1.55792                                   | 0.14097  | 0.2756      |
| 5000      | -                                         | -                                         | -        | -                              | $7.40543 \cdot 10^{-4}$                   | 1.46144                                   | 0.12734  | 0.24793     |

**Table S13.** Best-fit parameters ( $\chi_s$ ,  $\chi_t$ ,  $\alpha$ ,  $\tau$ ) to the generalized single (1600 – 5000 Oe) or double (0 – 1400 Oe) Debye model for the frequency ( $\nu$ ) dependence of the out-of-phase magnetic susceptibility ( $\chi''$ ) as a function of applied field ( $H$ ) at 6 K for **2**.

| $H$<br>Oe | $\chi_s$<br>$\text{cm}^3 \text{mol}^{-1}$ | $\chi_t$<br>$\text{cm}^3 \text{mol}^{-1}$ | $\alpha$ | $\tau^{-1}$<br>$\text{s}^{-1}$ | $\chi_s$<br>$\text{cm}^3 \text{mol}^{-1}$ | $\chi_t$<br>$\text{cm}^3 \text{mol}^{-1}$ | $\alpha$ | $\tau$<br>s |
|-----------|-------------------------------------------|-------------------------------------------|----------|--------------------------------|-------------------------------------------|-------------------------------------------|----------|-------------|
|           | LF                                        |                                           |          |                                | HF                                        |                                           |          |             |
| 0         | 0.01306                                   | 0.82441                                   | 0.05803  | 0.03793                        | 0.00265                                   | 0.70965                                   | 0.29333  | 0.00676     |
| 100       | 0.3293                                    | 0.58493                                   | 0.00102  | 0.07051                        | 0.40544                                   | 1.65968                                   | 0.24425  | 0.01692     |
| 200       | 0.41592                                   | 0.47575                                   | 0.00303  | 0.11379                        | 0.02417                                   | 1.50527                                   | 0.31737  | 0.0231      |
| 300       | 0.27133                                   | 0.50363                                   | 0.00654  | 0.19771                        | 0.00128                                   | 1.31337                                   | 0.36025  | 0.02117     |
| 400       | 0.16853                                   | 0.5834                                    | 0.00803  | 0.25833                        | 0.01284                                   | 1.14714                                   | 0.39096  | 0.01956     |
| 500       | 0.04475                                   | 0.62744                                   | 0.01023  | 0.28657                        | 0.04968                                   | 1.01223                                   | 0.42521  | 0.01811     |
| 600       | 0.00137                                   | 0.75731                                   | 0.01882  | 0.30574                        | 6.6154 $10^{-6}$                          | 0.79365                                   | 0.45618  | 0.01664     |
| 700       | 0.00103                                   | 0.9243                                    | 0.03365  | 0.31721                        | 0.02778                                   | 0.64268                                   | 0.47279  | 0.0135      |
| 800       | 0.0011                                    | 1.06647                                   | 0.0519   | 0.33333                        | 0.1287                                    | 0.60469                                   | 0.49899  | 0.01159     |
| 900       | 0.01098                                   | 1.19702                                   | 0.07145  | 0.34637                        | 0.0907                                    | 0.45781                                   | 0.53289  | 0.00914     |
| 1000      | 0.01605                                   | 1.25098                                   | 0.07709  | 0.36181                        | 0.05806                                   | 0.42476                                   | 0.61922  | 0.007       |
| 1200      | 0.00456                                   | 1.36252                                   | 0.08042  | 0.37                           | 0.10688                                   | 0.29693                                   | 0.63999  | 0.00503     |
| 1400      | 0.03406                                   | 1.42207                                   | 0.08101  | 0.38228                        | 0.01698                                   | 0.26317                                   | 0.70625  | 0.00303     |
| 1600      | 0.00219                                   | 1.46001                                   | 0.08245  | 0.38429                        | -                                         | -                                         | -        | -           |
| 1800      | 0.0013                                    | 1.4564                                    | 0.07636  | 0.3872                         | -                                         | -                                         | -        | -           |
| 2000      | 0.00137                                   | 1.44871                                   | 0.06963  | 0.38616                        | -                                         | -                                         | -        | -           |
| 2200      | 1.3968 $10^{-4}$                          | 1.45162                                   | 0.07299  | 0.38378                        | -                                         | -                                         | -        | -           |
| 2400      | 0.01123                                   | 1.4567                                    | 0.07143  | 0.3795                         | -                                         | -                                         | -        | -           |
| 2600      | 0.01855                                   | 1.45359                                   | 0.06674  | 0.37719                        | -                                         | -                                         | -        | -           |
| 2800      | 0.00209                                   | 1.43709                                   | 0.07521  | 0.37141                        | -                                         | -                                         | -        | -           |
| 3000      | 0.00186                                   | 1.418                                     | 0.06972  | 0.36215                        | -                                         | -                                         | -        | -           |
| 3500      | 0.06144                                   | 1.48351                                   | 0.0903   | 0.34831                        | -                                         | -                                         | -        | -           |
| 4000      | 0.0028                                    | 1.38476                                   | 0.09104  | 0.3197                         | -                                         | -                                         | -        | -           |
| 4500      | 2.1287 $10^{-4}$                          | 1.40825                                   | 0.13331  | 0.30299                        | -                                         | -                                         | -        | -           |
| 5000      | 0.00329                                   | 1.34128                                   | 0.13364  | 0.26367                        | -                                         | -                                         | -        | -           |



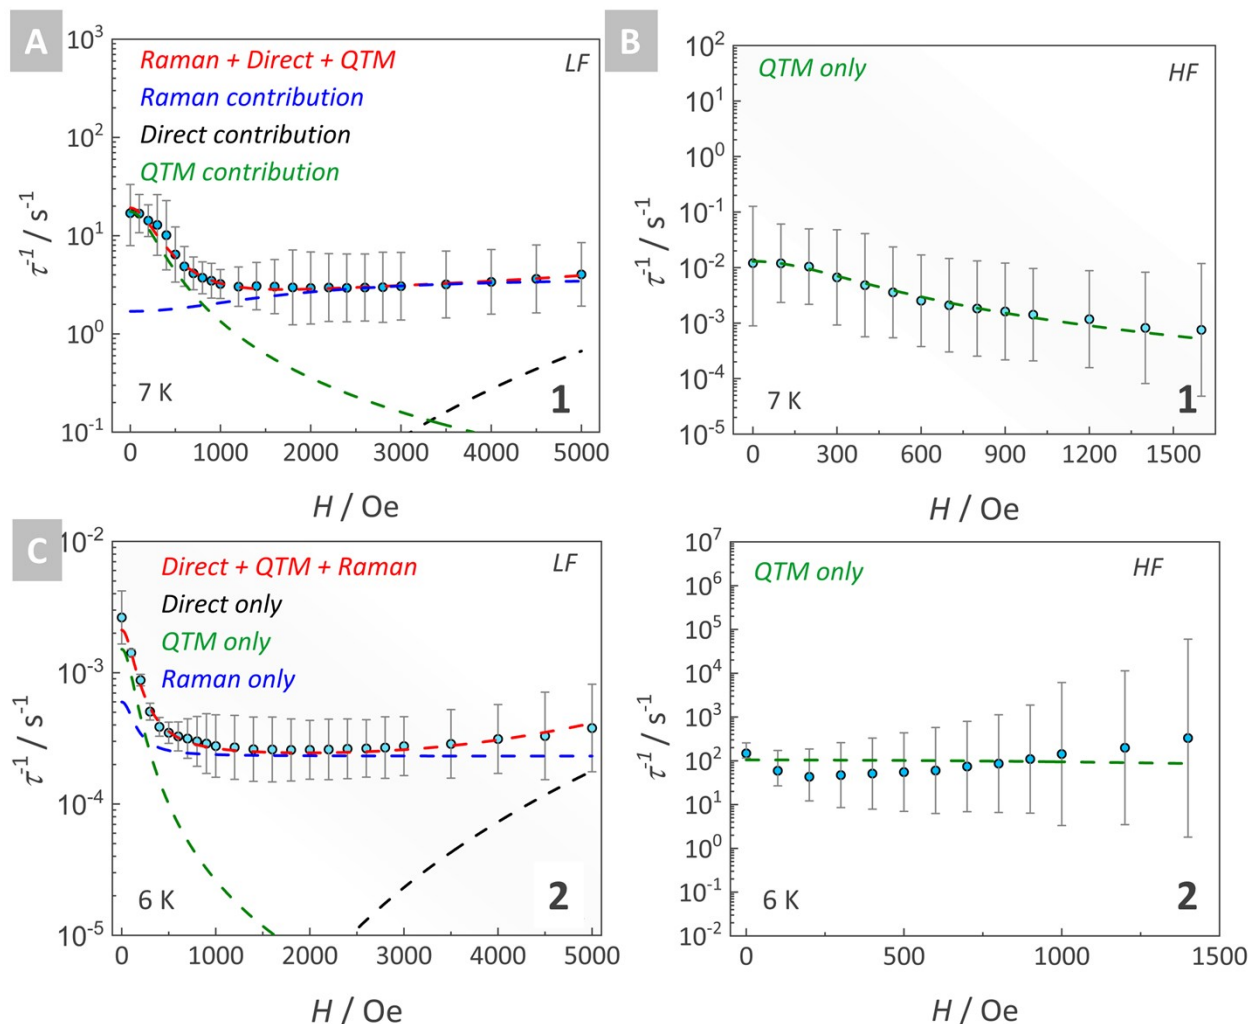

**Figure S20.** Field ( $H$ ) dependence of the relaxation rate of magnetization ( $\tau^{-1}$ ) at 7 K for **1** and 6 K for **2** considering the (a,c) lower frequency (LF) and (b,d) higher frequency (HF) processes. The solid lines represent the data best fit according to eqn 2, with parameters described in Table S14.

**Table S14.** Summary of the fitting parameters of the field ( $H$ ) dependence of the relaxation rate of magnetization ( $\tau^{-1}$ ) for **1** and **2**. HF = high frequency, LF = low frequency.

| Mechanism | Parameter                                        | 1                            |                             | 2                            |                             |
|-----------|--------------------------------------------------|------------------------------|-----------------------------|------------------------------|-----------------------------|
|           |                                                  | LF process                   | HF process                  | LF process                   | HF process                  |
| Direct    | $A / \text{s}^{-1} \text{Oe}^{-4} \text{K}^{-1}$ | $3.6 \pm 3.5 \cdot 10^{-16}$ | -                           | $4.8 \pm 2.1 \cdot 10^{-16}$ | -                           |
| QTM       | $B1 / \text{s}^{-1}$                             | $1.73 \pm 0.07 \cdot 10^1$   | $1.3 \pm 0.08 \cdot 10^2$   | $1.5 \pm 0.3 \cdot 10^1$     | $1.0 \pm 0.1 \cdot 10^2$    |
|           | $B2 / \text{Oe}^{-2}$                            | $1.2 \pm 0.1 \cdot 10^{-5}$  | $9.3 \pm 0.9 \cdot 10^{-6}$ | $5.7 \pm 0.3 \cdot 10^{-5}$  | $1.0 \pm 0.1 \cdot 10^{-7}$ |
| Raman     | $C / \text{s}^{-1} \text{K}^{-n}$                | $1.3 \pm 0.1 \cdot 10^{-3}$  | -                           | $1.3 \pm 0.1 \cdot 10^{-4}$  | -                           |
|           | $C1 / \text{Oe}^{-2}$                            | $4.9 \pm 2.7 \cdot 10^{-7}$  | -                           | $2.2 \pm 0.6 \cdot 10^{-5}$  | -                           |
|           | $C2 / \text{Oe}^{-2}$                            | $2.2 \pm 1.6 \cdot 10^{-6}$  | -                           | $5.7 \pm 1.5 \cdot 10^{-5}$  | -                           |
|           | $n$                                              | $6.4 \pm 0.1$                | -                           | $6.0 \pm 0.1$                | -                           |



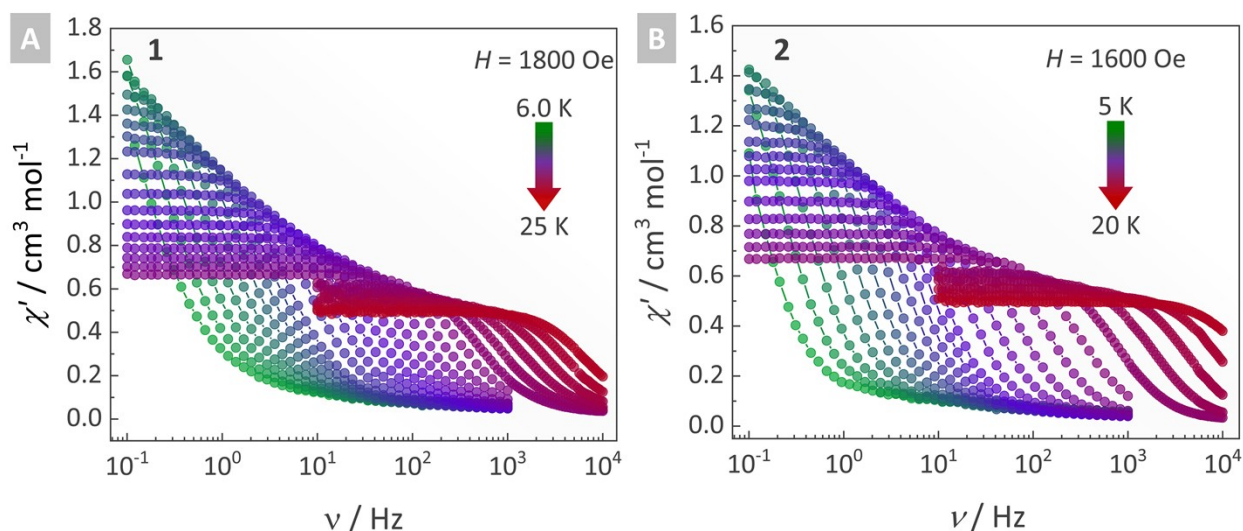

**Figure S21.** Frequency ( $\nu$ ) dependence of the in-phase ( $\chi'$ ) magnetic susceptibility as a function of temperature ( $T$ ) obtained at (a) 1800 Oe for **1** and (b) 1600 Oe for **2**.

**Table S15.** Best-fit parameters ( $\chi_s$ ,  $\chi_t$ ,  $\alpha$ ,  $\tau$ ) to the generalized single Debye model for the frequency ( $\nu$ ) dependence of the out-of-phase magnetic susceptibility ( $\chi''$ ) as a function of the temperature ( $T$ ) for **1**. Data collected with 1800 Oe.

| $T$<br>/ K | $\chi_s$<br>/ $\text{cm}^3 \text{mol}^{-1}$ | $\chi_t$<br>/ $\text{cm}^3 \text{mol}^{-1}$ | $\alpha$ | $\tau$<br>/ s          |
|------------|---------------------------------------------|---------------------------------------------|----------|------------------------|
| 6.0        | 0.18088                                     | 2.41966                                     | 0.24732  | 1.29222                |
| 6.5        | 0.00887                                     | 1.86447                                     | 0.19315  | 0.59321                |
| 7.0        | 0.00452                                     | 1.72412                                     | 0.17986  | 0.35423                |
| 7.5        | 0.01096                                     | 1.58307                                     | 0.15567  | 0.21483                |
| 8.5        | 0.00209                                     | 1.47279                                     | 0.1468   | 0.1393                 |
| 9          | 0.02567                                     | 1.41366                                     | 0.14035  | 0.09362                |
| 9.5        | 0.00356                                     | 1.3106                                      | 0.13059  | 0.06538                |
| 10         | 0.00204                                     | 1.24233                                     | 0.12718  | 0.04644                |
| 11         | 0.00254                                     | 1.18666                                     | 0.12444  | 0.03395                |
| 12         | 0.01391                                     | 1.096                                       | 0.12015  | 0.01935                |
| 13         | 0.02576                                     | 1.02185                                     | 0.11535  | 0.01156                |
| 14         | 0.00203                                     | 0.9199                                      | 0.11255  | 0.00723                |
| 15         | 0.00293                                     | 0.85854                                     | 0.10594  | 0.00466                |
| 16         | 0.00209                                     | 0.80388                                     | 0.09706  | 0.00305                |
| 17         | 0.005                                       | 0.75282                                     | 0.09093  | 0.00197                |
| 18         | 0.00202                                     | 0.70393                                     | 0.08085  | 0.00129                |
| 19         | 0.00192                                     | 0.65985                                     | 0.07114  | $8.2466 \cdot 10^{-4}$ |
| 20         | 0.00251                                     | 0.62055                                     | 0.05847  | $5.1470 \cdot 10^{-4}$ |
| 21         | 0.00209                                     | 0.59812                                     | 0.09477  | $3.0302 \cdot 10^{-4}$ |
| 22         | 0.00334                                     | 0.57289                                     | 0.09374  | $1.8020 \cdot 10^{-4}$ |
| 23         | 0.00243                                     | 0.54534                                     | 0.08612  | $1.0618 \cdot 10^{-4}$ |
| 24         | 0.00209                                     | 0.51554                                     | 0.07204  | $6.3194 \cdot 10^{-5}$ |
| 25         | 0.00209                                     | 0.4903                                      | 0.06486  | $3.7957 \cdot 10^{-5}$ |

**Table S16.** Best-fit parameters ( $\chi_s$ ,  $\chi_t$ ,  $\alpha$ ,  $\tau$ ) to the generalized single Debye model for the frequency ( $\nu$ ) dependence of the out-of-phase magnetic susceptibility ( $\chi''$ ) as a function of the temperature ( $T$ ) for **2**. Data collected with 1600 Oe.

| $T$<br>/ K | $\chi_s$<br>/ $\text{cm}^3 \text{mol}^{-1}$ | $\chi_t$<br>/ $\text{cm}^3 \text{mol}^{-1}$ | $\alpha$ | $\tau$<br>/ s           |
|------------|---------------------------------------------|---------------------------------------------|----------|-------------------------|
| 5.0        | 0.02122                                     | 1.85464                                     | 0.1353   | 1.62022                 |
| 5.5        | 0.02093                                     | 1.62436                                     | 0.10907  | 0.74421                 |
| 6.0        | 0.04423                                     | 1.53888                                     | 0.09223  | 0.39664                 |
| 6.5        | 0.14354                                     | 1.52997                                     | 0.07736  | 0.22548                 |
| 7.0        | 0.0097                                      | 1.30816                                     | 0.06759  | 0.13476                 |
| 7.5        | 0.01724                                     | 1.22914                                     | 0.05566  | 0.0852                  |
| 8.5        | 0.00984                                     | 1.15637                                     | 0.04868  | 0.05556                 |
| 9          | 0.005                                       | 1.09                                        | 0.04396  | 0.03777                 |
| 9.5        | 0.00437                                     | 1.0328                                      | 0.04038  | 0.02638                 |
| 10         | 0.01163                                     | 0.99053                                     | 0.04292  | 0.01873                 |
| 11         | 0.52302                                     | 1.46177                                     | 0.04282  | 0.01349                 |
| 12         | 0.00458                                     | 0.86322                                     | 0.04006  | 0.00746                 |
| 13         | 0.00242                                     | 0.79298                                     | 0.03986  | 0.00413                 |
| 14         | 0.00327                                     | 0.73891                                     | 0.04826  | 0.00224                 |
| 15         | 0.00588                                     | 0.69133                                     | 0.06007  | 0.00111                 |
| 16         | 0.05476                                     | 0.69521                                     | 0.07322  | $5.0631 \cdot 10^{-4}$  |
| 17         | $7.0886 \cdot 10^{-4}$                      | 0.60669                                     | 0.09673  | $2.0879 \cdot 10^{-4}$  |
| 18         | 0.00209                                     | 0.57327                                     | 0.08876  | $8.6323 \cdot 10^{-5}$  |
| 19         | 0.01984                                     | 0.56023                                     | 0.07859  | $3.75196 \cdot 10^{-5}$ |
| 20         | 0.0291                                      | 0.5345                                      | 0.06564  | $1.74886 \cdot 10^{-5}$ |

### Supplementary note S5 – Luminescence thermometry

The relative thermal sensitivity of **1** was calculated from eqn S3, where  $\Delta$  stands for the thermometric parameter and  $T$  is the temperature. The temperature uncertainty ( $\delta T$ ) was evaluated by means of eqn S4 and eqn S5, where  $\delta I/I$  is the relative uncertainty in the integrated area.<sup>9</sup>  $\delta I$  was calculated from the signal-to-noise ratio for each normalized spectrum measured within the 555 – 595 nm spectral range, which was close to 0.015 for all of them. Thus, eqn S5 can be reduced to  $\delta I/I = 0.010$  for all spectra considering the normalized spectra since  $I_{max} = 1$ .

$$S_r = \frac{1}{\Delta} \left| \frac{d\Delta}{dT} \right| \quad (S3)$$

$$\delta T = \frac{1}{S_r} \frac{\delta \Delta}{\Delta} \quad (S4)$$

$$\frac{\delta \Delta}{\Delta} = \sqrt{\left( \frac{\delta I_1}{I_1} \right)^2 + \left( \frac{\delta I_2}{I_2} \right)^2} = \sqrt{2} \frac{\delta I}{I} \quad (S5)$$

**Table S17.** Fitting parameter obtained using a logistic function (eqn S6) to describes the dependence of the thermometric parameter on temperature for **1**.

| Parameter | Value |
|-----------|-------|
| $A_1$     | 9.93  |
| $A_2$     | 31840 |
| $T_0/K$   | 4159  |
| $p$       | 2.26  |

$$\Delta = A_2 + \frac{A_1 - A_2}{1 + \left( \frac{T}{T_0} \right)^p} \quad (S6)$$

### Supplementary references

- <sup>1</sup> P. F. H. Schwab, F. Fleischer, J. Michl, *J. Org. Chem.*, 2002, **67**, 2, 443.
- <sup>2</sup> APEX Software Suite v 2010 Bruker AXS Inc. Madison Wisconsin USA, **2010**.
- <sup>3</sup> R. H. Blessing, *Acta Crystallogr. Sect. A* 1995, **A51**, 33.
- <sup>4</sup> G. M. Sheldrick, *Acta Crystallogr. A* 2008 **A64**, 112.
- <sup>5</sup> C. B. Hübschle, G. M. Sheldrick, B. Dittrich, *J. Appl. Crystallogr.* 2011, **44**, 1281.
- <sup>6</sup> M. Pinsky, D. Avnir, Continuous Symmetry Measures. 5. The Classical Polyhedra. *Inorg. Chem.*, 1998, **37**, 5575.
- <sup>7</sup> S. M. J. Aubin, Z. Sun, L. Pardi, J. Krzystek, K. Folting, L.-C. Brunel, A. L. Rheingold, G. Christou, D. N. Hendrickson, *Inorg. Chem.*, 1999, **38**, 5329.
- <sup>8</sup> D. Reta, N. F. Chilton, *Phys. Chem. Chem. Phys.*, 2019, **21**, 23567.
- <sup>9</sup> Brites, C. D. S.; Millán, A.; Carlos, L. D. Lanthanides in Luminescent Thermometry. In: Handbook on the Physics and Chemistry of Rare Earths; Elsevier, 2016; pp 339-427.
